1 **The human pathogenic bacterium *Shigella* proliferates in *Arabidopsis* plants through type III**  
2 **effector-mediated immune suppression**

3

4 Sung Hee Jo<sup>1,2</sup>, Jiyoung Lee<sup>1,3</sup>, Dong Wook Kim<sup>4,5</sup>, Dae Hee Lee<sup>2,6</sup>, Choong Min Ryu<sup>2,7</sup>, and Jeong  
5 Mee Park<sup>1,2,\*</sup>

6

7 <sup>1</sup>*Plant Systems Engineering Research Center, Korea Research Institute of Bioscience & Biotechnology*  
8 *(KRIBB), Daejeon, South Korea;* <sup>2</sup>*Department of Biosystems and Bioengineering, KRIBB School of*  
9 *Biotechnology, Korea University of Science and Technology (UST), Daejeon, South Korea;*  
10 <sup>3</sup>*Biological Resource Center, KRIBB, Jeongeup, South Korea;* <sup>4</sup>*Department of Pharmacy, College of*  
11 *Pharmacy, Hanyang University, Ansan, South Korea;* <sup>5</sup>*Institute of Pharmacological Research,*  
12 *Hanyang University, Ansan, South Korea;* <sup>6</sup>*Synthetic Biology and Bioengineering Research Center,*  
13 *KRIBB, Daejeon, South Korea;* <sup>7</sup>*Infectious Disease Research Center, KRIBB, Daejeon, South Korea.*

14

15 \*Address correspondence to:

16 Plant Systems Engineering Research Center, Korea Research Institute of Bioscience & Biotechnology  
17 (KRIBB), 125 Gwahak-Ro, Yuseong-Gu, Daejeon 34141, South Korea

18 Tel: +82-42-860-4346

19 Fax: +82-42-860-4468

20 E-mail: jmpark@kribb.re.kr

21

22 Running title: *Shigella* uses a T3SS to multiply in *Arabidopsis*

23

24

25

26

27

28 **Originality-significance statement**

29 Increased incidence of food-borne disease outbreaks caused by fresh produce contaminated  
30 with *Escherichia coli* O157:H7 and *Salmonella* spp. has prompted researchers to examine the  
31 interaction between these bacteria and various plant species under different environmental conditions.  
32 Although studies show that human enteropathogenic bacteria survive both on the surface of and inside  
33 plants, little is known about the molecular mechanism underlying plant invasion and colonization.  
34 Here, we examined the interaction between the human pathogenic bacterium *Shigella* and the model  
35 plant *Arabidopsis*. We found that four *Shigella* spp. strains proliferated successfully in *Arabidopsis*,  
36 causing symptom-like lesions in tissues. Using mutants lacking T3S effectors (i.e., noninvasive  
37 human strains), we demonstrated that effectors regulating pathogenesis of shigellosis in humans also  
38 play a central role in bacteria-plant interactions. To the best of our knowledge, this is the first study to  
39 examine *Shigella*-mediated virulence and host immune suppression in a plant host at a molecular level.

40

41

42 **Summary**

43 Although there is debate about whether human intestinal pathogenic bacteria are also plant  
44 pathogens, it is clear that these bacteria use plants as an alternative host. *Shigella*, which infects  
45 primates, is reportedly transmitted by fresh vegetables; however, its molecular interactions with plants  
46 have not been extensively studied. Here, we show that four *Shigella* strains, *S. boydii* (*S. b*), *S. sonnei*  
47 (*S. s*), *S. flexneri* 2a (*S. f*2a), and *S. flexneri* 5a (*S. f*5a), proliferated at different levels in *Arabidopsis*  
48 *thaliana*. Microscopic studies revealed that these bacteria were present inside leaves and damaged  
49 plant cells. GFP-labeled *S. b*, *S. f*2a, and *S. f*5a entered plants via guard cells, and *S. f*2a infiltrated  
50 root tissues and colonized roots. Using mutants lacking type III secretion systems (T3SS), we found  
51 that T3SS of *Shigella* that regulate the pathogenesis of shigellosis in humans also play a central role in  
52 attachment and multiplication in *Arabidopsis*. Furthermore, the immunosuppressive activity of two  
53 T3S effectors, OspF and OspG, were needed for the proliferation of *Shigella* in *Arabidopsis*. These  
54 findings demonstrate that *Shigella*-mediated virulence determinants are expressed, and pathogenic

55 symptoms are observed, in model plants.

56

57

58 **Keywords: Plant-*Shigella* interaction, *Shigella* spp., Alternative host, Type III secretion system**

59

60

## 61 **Introduction**

62 *Shigella* is a Gram-negative bacterium from the *Enterobacteriaceae* family. It is a non-motile,

63 rod-shaped, facultative intracellular and invasive pathogen, very closely related to *Escherichia coli*.

64 Based on the carbohydrate composition of the O-antigen, i.e., the polysaccharide component of the

65 lipopolysaccharide molecule that is the major bacterial surface antigen, *Shigella* is classified into four

66 serogroups. These have been given species designations, namely, *S. dysenteriae* 1 (serogroup A), *S.*

67 *flexneri* (serogroup B), *S. boydii* (serogroup C), and *S. sonnei* (serogroup D) (Lindberg et al., 1991;

68 Schroeder and Hilbi, 2008). *Shigella* spp. are important epidemic pathogens and a serious public

69 health concern in developed and developing countries. Although about 164,300 deaths in all age

70 groups, and 54,900 deaths in children younger than 5 years, were reported globally in 2015, the actual

71 number of infections might be higher because mild symptoms are not reported (Mortality and Causes

72 of Death, 2016). This means that the microorganism may employ a variety of survival strategies not

73 only for infection but also for survival in a restricted host. In recent years, the morbidity or mortality

74 of the infection caused by the emergence of *Shigella* that produces  $\beta$ -lactamase, an enzyme that

75 underpins the resistance to the third-generation antibiotics cephalosporins, has been increasing (Zhang

76 et al., 2011).

77 *Shigella* is a human-adapted pathogen that infects the host via multiple transmission routes.

78 Human hosts are primarily infected by the ingestion of water or food contaminated with bacteria from

79 feces (the fecal-oral route), including ingestion of undercooked contaminated meats and improperly

80 washed contaminated vegetables (Mead et al., 1999; Weir, 2002; Gupta et al., 2004). Fresh fruits and

81 vegetables, such as lettuce, tomatoes and green peppers, are responsible for the widespread  
82 transmission of food-borne infections by *Salmonella* or *Shigella* (Guchi and Ashenafi, 2010; Semenov  
83 et al., 2010; Gu et al., 2013). These observations suggest that human pathogenic bacteria use plants as  
84 alternative hosts as a stable environmental niche. Several human pathogenic bacteria, including  
85 *Salmonella enterica* serovar Typhimurium, *Escherichia coli* O157:H7, and *Pseudomonas aeruginosa*,  
86 are known to use plants as alternative hosts (Plotnikova et al., 2000; Semenov et al., 2010). These  
87 bacteria can attach to the plant surface, and actively invade and proliferate in plant tissues (Cevallos-  
88 Cevallos et al., 2012; Martínez-Vaz et al., 2014). In particular, several enteropathogenic bacteria,  
89 including *E. coli* O157:H7 and *Salmonella*, spread within plants through vascular tissues after  
90 infection via contaminated water (Solomon et al., 2002). Although *Shigella* contamination has also  
91 been reported in plants, it is not yet known whether the bacterium actively invades and/or proliferates  
92 inside the plant.

93           Unlike animals, plants have no adaptive immune system; instead, each cell possesses an  
94 innate immune system. The innate immune system in plants and animals recognizes and suppresses  
95 pathogens and has common features that are preserved throughout evolution. Plant pattern recognition  
96 receptors recognize conserved microbial or pathogen-associated molecular patterns; the pattern-  
97 triggered immunity (PTI) is activated via the mitogen-activated protein kinase (MAPK) cascades  
98 (Jones and Dangl, 2006). To suppress PTI, bacteria inject effector proteins into plant cells using type  
99 III secretion systems (T3SS). To counteract this PTI evasion response, the plant nucleotide binding-  
100 leucine rich repeat proteins recognize the pathogen effectors; effector-triggered immunity is then  
101 activated to accompany the hypersensitive response (Jones and Dangl, 2006). For human or animal  
102 intestinal bacteria to infect plants, the PTI must first be disabled. *S. enterica* serovar Typhimurium,  
103 similar to its activity in the mammalian host, uses T3SS to suppress plant immune responses  
104 (Schikora et al., 2011; Schikora et al., 2012). In particular, SpvC, one of the T3S effector proteins of *S.*  
105 *enterica*, targets the MAPK signaling system in both plant and animal hosts to suppress the host PTI  
106 (Neumann et al., 2014).

107           Here, we examined the ability of four *Shigella* strains (*S. s* (Holt et al., 2012), *S. b* and *S. f*2a

108 (Wei et al., 2003), and *S. f5a* (Onodera et al., 2012)) to proliferate in *Arabidopsis* plants. We found  
109 that the four strains invaded and proliferated differently in plant tissues. Proliferation of mutants  
110 lacking the T3S effectors, i.e., noninvasive human strains, was reduced *in planta*. Reverse genetics  
111 and molecular biology experiments demonstrated that the immunosuppressive function of *Shigella*  
112 T3S effectors OspF and OspG was important for *Shigella* proliferation in plants. These observations  
113 indicate that *Arabidopsis* may be useful as a model host for studying the pathogenesis of *Shigella*.

114

115

## 116 **Results**

### 117 **Four *Shigella* spp. strains interact differently with *Arabidopsis***

118 To observe the behavior of the human pathogen *Shigella* in plants, we investigated the  
119 interaction of four *Shigella* spp. strains representing three serogroups (*S. b.*, *S. s.*, *S. f2a*, and *S. f5a*)  
120 with the model plant *A. thaliana*. *Shigella* is a water-borne pathogen, with infection spreading via  
121 contaminated water (Pandey et al., 2014). Hence, we chose to use a flood-inoculation approach  
122 (Ishiga et al., 2011), which is thought to mimic natural inoculation closely. Similarly to the  
123 phytopathogen *Pseudomonas syringae* pv. *tomato* DC3000 (*Pst*), when 2-week-old *Arabidopsis*  
124 seedlings were inoculated with *S. s* or *S. f2a*, clear symptoms were observed, such as yellowing and  
125 necrosis of the leaves (Fig. 1A). On the other hand, no obvious symptoms were apparent after  
126 inoculation with *S. b* and *S. f5a* (Fig. 1A) (Liu et al., 2015). *Pst*  $\Delta$ *hrcC*, a mutant lacking the T3SS of  
127 *Pst*, and the non-pathogenic bacterium *E. coli* DH5 $\alpha$  were used as negative controls for infection. In  
128 addition to observing the symptoms, the bacterial growth *in planta* was also evaluated, to detect initial  
129 plant adherence and proliferation. Early attachment of all *Shigella* strains and DH5 $\alpha$  was more than 10  
130 times lower than that of *Pst* and *Pst*  $\Delta$ *hrcC* (Fig. 1B). However, at 3 days post-inoculation (dpi), the  
131 extent of cell amplification differed depending on the *Shigella* strain; nevertheless, the cell number of  
132 all strains increased more than 1 000 times. Notably, *S. s* cell numbers increased over 10<sup>5</sup> times. This  
133 level of proliferation was comparable to that of plant pathogens. By contrast, the interaction between  
134 *S. f5a* and *Arabidopsis* (in terms of symptoms and/or proliferation) was similar to that between the

135 plant and non-pathogenic DH5 $\alpha$ .

136           Apparently different symptoms and bacterial proliferation rates were observed for different  
137 *Shigella* strains. This suggested that a variability of the plant interaction mechanisms among the  
138 strains, e.g., the adherence and multiplication, might contribute to the differences. Differences in the  
139 nutritional requirements of bacterial strains may constitute another reason for the differences in the  
140 growth rates within the *Arabidopsis* host.

141

#### 142 **Penetration of the plant leaf surface and subsequent internalization of *Shigella* spp.**

143           Since we observed that *Shigella* proliferate and induce disease-like symptoms in *Arabidopsis*,  
144 we used scanning electron microscopy (SEM) and transmission electron microscopy (TEM) to  
145 examine whether the bacterium multiplies on the leaf surface or in the intercellular space (apoplast).  
146 The cuticle of a plant leaf is the first physical barrier encountered by the pathogen; known plant  
147 pathogens enter the host plant cell through a wound, an open stomata, or a vector (Yeats and Rose,  
148 2013). As anticipated, *Pst*, which infects plants via open stomata (Panchal et al., 2016), colonized  
149 guard cells at 24 h post-infection (Fig. 2). All tested *Shigella* strains clustered around guard cells and  
150 the surface of epidermal cells (Fig. S2). *S. s* and *S. b* formed relatively wide clusters in the  
151 surrounding areas, including guard cells (Fig. 2 and S2). In particular, *S. b* and *S. f 2a* intensely  
152 colonized guard cells (Fig. 2), leading us to speculate that they enter plants via open stomata, similar  
153 to *Pst*.

154           Most plant pathogenic bacteria *in planta* infect and colonize the apoplast (Abramovitch et al.,  
155 2006; Gao et al., 2016). We used TEM to investigate whether *Shigella* is capable of intercellular  
156 colonization and causing damage to plant cells by analyzing *Arabidopsis* leaves flood-inoculated with  
157 *Shigella* (Fig. 3). Indeed, the TEM images revealed *Shigella* colonization of the intercellular spaces  
158 and bacterial attachment to the host cell walls. The presence of the microbes in the intercellular space  
159 resulted in the alteration of the host organelle structure, such as the separation of the plasma  
160 membrane from the cell wall, the liberation of cell organelles, and disruption of chloroplasts (Fig. 3).  
161 This effect was most pronounced in plant cells inoculated with *S. b* and *S. s*; further, *S. s* and *S. b* were

162 more commonly found in the intercellular spaces than *S. f 2a* and *S. f 5a*.

163 Taken together, these results indicated that, although the proliferative capacity of the  
164 *Shigella* strains differs, the cells can invade and colonize the apoplast of plants, thereby causing  
165 structural damage to the host.

166

### 167 **Penetration of Arabidopsis root tissue by *Shigella* strains**

168 Previously published studies demonstrate that several human pathogenic bacteria, including  
169 *E. coli* O157:H7 and *Enterococcus faecalis*, invade the leaves and roots of *A. thaliana* (Jha et al.,  
170 2005; Deering et al., 2012). To determine whether *Shigella* strains invade through *A. thaliana* roots,  
171 we attempted to label the four *Shigella* strains and DH5a with green fluorescent protein (GFP) and  
172 then observe them in live plant tissues. The *S. b*, *S. f 2a*, and *S. f 5a* strains were labeled successfully  
173 with GFP (the *S. s* strain was not), confirming that GFP labeling did not affect their growth in plants  
174 (Fig. S1).

175 Next, bacterial suspensions were dropped onto the root tips of *Arabidopsis* plants that were  
176 grown vertically. Five days later, whole plants and root tissues were photographed under ultraviolet  
177 (UV) light to observe the distribution of fluorescently labeled bacteria (Fig. 4). In accordance with the  
178 disease phenotypes observed, *Pst* (which is a foliar pathogen) exhibited strong fluorescence  
179 throughout the plant, despite the fact that it was applied to root tips (Fig. 4A). To observe *Pst* in root  
180 tissues, inoculated roots were washed with sterile water and observed under a fluorescence  
181 microscope. GFP fluorescence was observed only in epidermal cells after application of *Pst* to root  
182 tips (Fig. 4B). This finding indicates that *Pst* spreads throughout the entire plant along its surface, not  
183 by invading root tissues or colonizing the roots. Fluorescence was also observed throughout plants  
184 when GFP-labeled *S. b*, *S. f 2a*, and *S. f 5a* were applied to root tips, although the fluorescence  
185 intensity differed (Fig. 4A). In root tissues, GFP fluorescence was observed in root endodermal cells  
186 only in *S. f 2a*-treated plants (Fig. 4B). Taken together, these results indicate that *Shigella* invades  
187 plant leaves and roots in a strain-dependent manner, and then moves along the surface and through the  
188 internal vascular tissues of the plant.

189 In addition, we dropped bacterial solutions onto root tips and observed symptoms in  
190 *Arabidopsis* plants for 14 d. Severe inhibition of root growth and leaf yellowing were observed in  
191 plants inoculated by the *S. b*, *S. s*, and *S. f 2a* strains (Figure S3). Inoculation of *S. f 5a* caused slight  
192 inhibition of root growth, but caused much less damage to the plant than other strains.

193

#### 194 ***Shigella* T3S effectors are necessary for attachment and multiplication in *Arabidopsis***

195 T3SS is the key determinant of the virulence of many Gram-negative bacteria, including  
196 animal and plant pathogens. Thus, we investigated if pathogenic proteins, which are involved in  
197 animal host infections, are required for invasion and multiplication of *Shigella* in plants. To study the  
198 biological role of T3SS in the interaction between *Shigella* and plants, we used noninvasive variants  
199 of *S. f 2a* and *S. f 5a* (strains  $\Delta$ vp and BS176, respectively) (Sansonetti et al., 1982; Wenneras et al.,  
200 2000; Shim et al., 2007). To facilitate observation of bacterial invasion in living plants, strains *S. f 2a*,  
201 *S. f 5a*, and their variants were labeled with GFP, and bacterial growth and expression of effector  
202 proteins were verified (Fig. S4). Bacterial proliferation in plants after inoculation with  $\Delta$ vp or BS176  
203 strains was 10 times lower than that after inoculation by parental *Shigella* strains; similar results were  
204 observed for GFP-labeled *Shigella* strains and mutants (Fig. 5A).

205 To examine involvement of T3SS in bacterial invasion of the plant surface, leaves were  
206 flood-inoculated with GFP-labeled bacteria and leaf surfaces were observed 24 h later (Fig. 5B).  
207 Examination under UV light revealed that the levels of GFP-labeled *S. f 2a* and *S. f 5a* on leaf surfaces  
208 were higher than those of  $\Delta$ vp and BS176, especially in open stomata (Fig. 5B). We also confirmed  
209 that none of the *Shigella* strains grew in plant culture medium (Fig. S5), and that effector protein  
210 expression was maintained in bacteria recovered from plants (Fig. S6).

211 To determine if other *Shigella* serotypes interact with plants in a T3SS-dependent manner,  
212 we attempted to obtain *S. s* and *S. b* mutants that had lost pathogenic plasmids via continuous  
213 subculture. A non-pathogenic mutant was successfully obtained for *S. s* (Fig. S7). When plants were  
214 inoculated with this T3SS-deficient *S. s* strain, disease phenotypes and bacterial growth were greatly  
215 reduced (Fig. S7), as observed with the *S. f* serotype. Altogether, these results suggested that the T3SS



216 of *Shigella* that operate during an infection in human are also required for interactions with plants.

217

218 **Expression of *Shigella* T3S effector genes and modulation of *Arabidopsis* MAPK signaling after**  
219 ***Shigella* inoculation**

220 To further investigate involvement of *Shigella* T3S effectors in plant interactions, we  
221 measured expression of key virulence effectors related to human pathogenesis, including *ipaB*, *ipaC*,  
222 *icsA*, *icsB*, *virB*, and *virF*, in *S. f 2a*-, *S. f 5a*-,  $\Delta$ v<sub>p</sub>-, and BS176-infected *Arabidopsis* plants (Bando et  
223 al., 2010). These effectors play a role in mammalian cell lysis (*ipaB*, *ipaC*), intracellular spread (*icsA*,  
224 *icsB*), and regulation of virulence factor (*virF*, *virB*) expression (Ogawa et al., 2008). Total RNAs  
225 were isolated from *Arabidopsis* leaves at 6 and 12 h after *Shigella* inoculation, and changes in  
226 expression of virulence genes were confirmed by quantitative RT-PCR (Fig. 6A). Expression of all  
227 *Shigella* virulence genes examined in WT *S. f 2a*- or *S. f 5a*-inoculated *Arabidopsis* leaves increased.  
228 In particular, induction was higher and faster in *S. f 2a*-treated plants than in *S. f 5a*-treated plants,  
229 which is in agreement with the earlier results showing that *S. f 2a* was more pathogenic to plants than  
230 *S. f 5a*. Expression of virulence genes was not detected in plants inoculated with non-pathogenic  
231 mutants  $\Delta$ v<sub>p</sub> or BS176, similar to buffer-treated control plants. These results indicate that common  
232 virulence factors regulate interactions with both plants and human intestinal cells.

233 To investigate the plant innate immune responses to *Shigella* inoculation, MAPK  
234 phosphorylation was evaluated. The activation of MAPK by phosphorylation is a conserved response  
235 of the earliest microbe-triggered immune signaling in both plants and animals (Zipfel, 2009). The  
236 flg22 peptide is a representative microbe-associated molecular pattern in plants (Bethke et al., 2009).  
237 In plants treated with flg22, pronounced MAPK phosphorylation was apparent within 5 min of  
238 treatment and this response lasted up to 30 min (Fig. 6B). On the other hand, MAPK phosphorylation  
239 in plants treated with *S. f 2a* or *S. f 5a* was reduced; from 15 min on, it was strongly suppressed and  
240 almost completely disappearing after ca. 30 min (Fig. 6B). Meanwhile, in plants treated with the  
241 virulence plasmid-deficient mutants,  $\Delta$ v<sub>p</sub> or BS176, MAPK activation was recovered, in contrast to *S.*  
242 *f 2a*- or *S. f 5a*-treated plants, although the degree and duration of the phosphorylation were lower than

243 those elicited by the flg22 treatment (Fig. 6B). These observations indicated that *Shigella* suppresses  
244 the innate immunity of *Arabidopsis* via its T3S virulence effectors.

245

## 246 **Suppression of immune signaling in *Arabidopsis* plants by *Shigella* T3S effectors OspF and** 247 **OspG**

248 The most important role of T3S effector proteins injected into host cells is modulation of the  
249 host immune response. Therefore, we chose two *Shigella* effectors, OspF and OspG, to study  
250 suppression of plant immune responses by *Shigella* effector proteins. *Shigella* OspF was chosen  
251 because of its ability to inhibit MAPK signaling, which is conserved in plants and animals (Arbibe et  
252 al., 2007; Li et al., 2007). OspG is an important immunosuppressive effector protein secreted at the  
253 later stages of infection; this protein interferes with activation of the NF- $\kappa$ B pathway (Kim et al.,  
254 2005), which is absent from plants.

255 To find out whether OspF and OspG have virulence activity in plants, we introduced them  
256 into a phytopathogen, *Pst*, and monitored its pathogenicity. First, we used an AvrRpt2-derived T3SS  
257 reporter system to check that the introduced OspF or OspG protein was delivered to plant cells via *Pst*  
258 T3SS (Mudgett, 2005). When *Arabidopsis* leaves were syringe-infiltrated with various *Pst*-producing  
259 AvrRpt<sup>101-255</sup> constructs, we found that *Pst* producing OspF:AvrRpt<sup>101-255</sup> or OspG:AvrRpt<sup>101-255</sup>  
260 induced a cell death response at 1 dpi, while control *Pst* cells containing the empty vector did not.  
261 This indicated that the *Shigella* effectors OspF and OspG were delivered successfully into  
262 *Arabidopsis* cells via *Pst* T3SS (Fig. S8A, B). Full-length AvrRpt2 was used as a positive control for  
263 cell death response. Finally, we examined whether the virulence of *Pst* was increased by expression of  
264 *Shigella* OspF or OspG. Plants infected with *Pst* cells producing OspF: HA or OspG: HA showed  
265 more severe symptoms than plants infected with the empty vector control (Fig. 7A; Fig. S8C). In  
266 addition, the number of bacterial cells was 10 times higher than that in plants infected with the empty  
267 vector control (Fig. 7B). Production of OspF:HA and OspG:HA by *Pst* was confirmed by  
268 immunoblotting with an anti-HA antibody (Fig. S8D). Taken together, these observations suggest that  
269 the *Shigella* effectors OspF and OspG function as virulence factors in plant cells.

270 We attempted to produce the OspF and OspG proteins in plant cells to verify whether their  
271 known function in the human host is conserved in the plant cell. To do this, subcellular localization of  
272 the two proteins fused with GFP was evaluated in the plant cells. The DNA fragments encoding the  
273 OspF:GFP and OspG:GFP fusions were inserted into a binary plant expression vector and transiently  
274 expressed in *Nicotiana benthamiana* leaves using the *Agrobacterium* system (Fig. S9A, B). The  
275 fluorescence signal for both proteins was strong in the plant cell nucleus; OspF:GFP fluorescence was  
276 also observed along the cytoplasmic membrane, and punctate OspG:GFP fluorescence was observed  
277 in the cytosol (Fig. S9C). In the host human cell, OspF localization is nuclear (Zurawski et al., 2006;  
278 Arbibe et al., 2007) and that of OspG is nuclear and cytoplasmic (Kim et al., 2005; Zhou et al., 2013;  
279 de Jong and Alto, 2014), i.e., their subcellular localization is similar to that of plant cells.

280 Previously, *in vitro* studies demonstrated that OspF exerts a phosphothreonine lyase activity  
281 and irreversibly removes phosphate groups from MAPK (Arbibe et al., 2007; Li et al., 2007). We used  
282 a phenotypic screening system involving a MEK2 (a tobacco MAP kinase kinase2) mutant, MEK2<sup>DD</sup>,  
283 to investigate whether the virulence associated with *Shigella* OspF in plants was linked to the same  
284 mechanism of action as in animals. MEK2<sup>DD</sup>, a constitutively active mutant of MEK2, induces cell  
285 death when overproduced in plant leaves (Yang et al., 2001; Kim and Zhang, 2004). In this  
286 experiment, an HA:MEK2<sup>DD</sup> clone fused to an HA epitope tag at the N-terminus was used to monitor  
287 expression of MEK2<sup>DD</sup>. As expected, co-production of HA:MEK2<sup>DD</sup> and GFP (control) resulted in a  
288 pronounced cell death (Fig. 7C). Co-production of OspF:GFP, but not OspG:GFP, and MEK2<sup>DD</sup>  
289 completely inhibited the MEK2<sup>DD</sup>-induced cell death (Fig. 7C). The production of the two effectors  
290 fused with GFP was then evaluated in the MEK2<sup>DD</sup>-producing plant leaves; the production of  
291 OspF:GFP was apparent, but that of OspG:GFP was not (Fig. 7D), even though both proteins were  
292 stably produced in the absence of MEK2<sup>DD</sup> (Fig. S9B). The degradation of the OspG protein may  
293 have been associated with the activated MAPK. Indeed, as assessed by immunoblotting with specific  
294 anti-phosphorylated MAPK antibodies, MAPK phosphorylation was very weak in the OspF:GFP-  
295 producing plant samples in comparison with GFP- or OspG:GFP-producing plant samples (Fig. 7D).  
296 The production of MEK2<sup>DD</sup> protein was confirmed in all samples using anti-HA antibodies (Fig. 7D).

297           These observations strongly suggest that the *Shigella* effector OspF inhibits plant immune  
298 responses by inhibiting activation of MAPK (as in humans), and that OspG induces  
299 immunosuppression in plants by targeting distinct MAPK pathways.

300

### 301 **OspF or OspG affects *Shigella* proliferation in plants**

302           To see whether the OspF or OspG proteins play a role in the interaction between *Shigella* and  
303 plants (as in human cells), we inoculated plants with *S. f* 5a mutants lacking the OspF or OspG  
304 proteins and examined their growth. Growth of mutants lacking *ospF* or *ospG* was as deficient as that  
305 of the virulence plasmid-deficient mutant BS176 (Fig. 8A). Reduced growth of *S. f* 5a  $\Delta$ *ospF* or *S. f*  
306 5a  $\Delta$ *ospG* mutants was restored completely by complementation of the mutation, indicating that these  
307 two effector proteins are indeed important for bacterial growth in plants (Fig. 8A). Next, we  
308 monitored activation of MAPKs to determine whether plant immune suppression was affected by  
309 deletion of *ospF* or *ospG*. As shown in Figure 8B, *S. f* 5a  $\Delta$ *ospF* induced stronger phosphorylation of  
310 MAPKs than wild-type *S. f* 5a; this was offset by complementation with OspF. By contrast,  
311 phosphorylation of MAPK in *S. f* 5a  $\Delta$ *ospG*-inoculated plants was no different from that in plants  
312 inoculated with wild-type *S. f* 5a, although phosphorylation of MAPKs increased slightly after  
313 complementation with OspG (Fig. 8B). Taken together, these results indicate that *Shigella* effectors  
314 OspF or OspG play an important role in increasing bacterial proliferation in both plant and animal  
315 hosts.

316

317

### 318 **Discussion**

319           In the current study, we investigated the interaction of the human pathogenic bacterium,  
320 *Shigella*, with an alternative host, the *Arabidopsis* plant. We demonstrated that four *Shigella* strains, *S.*  
321 *b*, *S. s*, *S. f* 2a, and *S. f* 5a, invade and colonize *Arabidopsis* to different extents. It has been clearly  
322 demonstrated that, in human, *Shigella* initially enters the epithelial layer via the M cells through  
323 transcytosis, leading to the invasion of the basolateral surfaces of the intestinal epithelial cells. A

324 subsequent gut inflammation leads to the activation of the innate immune response (Phalipon and  
325 Sansonetti, 2007). We demonstrated in the current study that, in addition to the human host, *Shigella*  
326 invades *Arabidopsis*, through vascular tissues and leaf stomata pores (Figs. 2-4). In particular, *S. s* and  
327 *S. b* formed relatively wide clusters in the surrounding areas, including the guard cells (Fig. 2; Fig.  
328 S2). Interestingly, we found that the four studied strains of *Shigella* associate with the plant cells and  
329 induce different plant responses. The bacterial loads of *S. s in planta* were relatively higher than those  
330 of the other strains. By contrast, inoculation of *S. f 5a* was associated with lower bacterial proliferation  
331 and less severe symptoms than observed for other strains (Figs. 1-4; Fig. S2 and Fig. S3). *S. f 2a* and  
332 *S. f 5a*, which belong to the same serogroup (Lindberg et al., 1991), elicited distinctly different plant  
333 responses with respect to disease symptoms. The specific plant responses, which were different for  
334 bacterial strains within the same serogroup, suggest that virulent effectors may play a relatively more  
335 important role in plant interactions. These observations also indicate that specific plant immune  
336 systems may be useful in the search for novel virulence factors expressed by different *Shigella* strains.  
337 Many Gram-negative bacterial pathogens utilize common infection strategies to colonize and invade  
338 plant and animal cells, and pathogenicity appears to depend on highly conserved T3SSs, which  
339 deliver the effector proteins to host cells (Buttner and Bonas, 2003). By using avirulent mutant strains,  
340 we were able to show that effectors that regulate the pathogenesis of shigellosis in humans also play a  
341 central role in regulating interactions with *Arabidopsis*. We showed that secretion of T3S effectors is  
342 required to trigger both symptoms and expression of the invasive phenotypes in plants (Fig. 5; Fig.  
343 S7). Furthermore, the effector proteins impacted MAPK-dependent innate immune responses in  
344 *Arabidopsis* (Fig. 6-8). Although reduced colonization of T3SS-deficient pathogenic *E. coli* in plants  
345 was previously reported, in contrast with the present study, they suggested that *E. coli* uses the T3SS  
346 apparatus for attachment to leaves, rather than for bacterial growth inside plants (Shaw et al., 2008).  
347 The relevance of T3SS for multiplication of *Salmonella* in plants remains unclear due to the different  
348 effects of T3SS function on *Salmonella*-plant interactions (Iniguez et al., 2005; Schikora et al., 2011;  
349 Shirron and Yaron, 2011). By contrast, the T3SS and specific effectors play an important role in  
350 proliferation and survival of *Pseudomonas syringae* pv. *syringae* B728a on the plant leaf surface (Lee

351 et al., 2012). Until now, the transfer of effector proteins into plant cells by T3SS of animal bacterial  
352 pathogens has not been reported. Our results indirectly suggest that *Shigella* effectors can be  
353 transferred into plant cells; however, direct evidence, such as visualization of the delivery of effectors  
354 using split fluorescent proteins (Park et al., 2017), is required.

355       Expression of the T3SS of *Shigella* is regulated at the transcriptional level and is activated at  
356 a permissive temperature ( $\geq 32^{\circ}\text{C}$ ) (Tobe et al., 1991; Campbell-Valois and Pontier, 2016). We were  
357 able to observe expression of the T3SS genes of *Shigella* under temperatures at which plants grow ( $22$   
358  $\pm 3^{\circ}\text{C}$ ) (Fig. 6A). A recent study showed that elevation of the temperature increases T3SS-mediated  
359 virulence of the phytopathogen *Pst* in plants, which is in contrast with the negative effect of high  
360 temperature on expression of the T3SS of *Pst in vitro* (Huot et al., 2017). Regardless of the  
361 temperature of host cells, it will be interesting to determine whether *Shigella* regulates T3SS gene  
362 expression *in vivo* and to identify factors that influence T3SS gene expression other than plant  
363 temperature.

364       *Salmonella* strains capable of proliferating on plant leaves and actively entering plant tissues,  
365 root hairs, or trichomes were recently shown to exhibit virulence in animals (Barak et al., 2011;  
366 Golberg et al., 2011; Schikora et al., 2011). We demonstrated that *Shigella* strains actively colonize  
367 the surface of and inside *Arabidopsis* leaves and root tissues (Figs. 1–4) and that bacteria recovered  
368 from plants maintain expression of pathogenic proteins (Fig. S6). Collectively, these findings suggest  
369 that, similar to *Salmonella*, *Shigella*-inoculated plants are a serious risk to food safety and that  
370 contamination of plants is another route underlying infection of *Shigella*, an important human  
371 pathogenic bacterium. In this study, we only observed plants artificially inoculated with *Shigella* in a  
372 laboratory environment. Therefore, to confirm the food safety concern surrounding *Shigella*-  
373 inoculated plants, the ability of *Shigella* to infect a variety of crops grown in the field should be tested.  
374 The pathogenicity of plant-isolated *Shigella* in animals should also be investigated.

375       The current study provides new insights into host invasion mechanisms utilized by *Shigella*  
376 to interact with an alternative host, the plant *Arabidopsis*. Studying trans-kingdom pathogenesis  
377 involving human-adapted pathogens, such as *Shigella*, may uncover novel pathogenic mechanisms

378 uniquely activated in response to specific hosts. When we isolated the two *Shigella* effectors OspF  
379 and OspG, and produced them in plant cells, their localization coincided with that in the animal cells  
380 (Fig. S9C), and it was apparent that the production of both proteins increased the virulence of plant  
381 pathogens (Fig. 7). In addition, we confirmed that OspF inhibits the innate immune response of plants  
382 via the same enzymatic activity as in animals (Fig. 7 and Fig. 8). In animals, OspG inhibits the host  
383 immune response by inhibiting the activity of NF- $\kappa$ B by blocking degradation of I $\kappa$ B (Ashida et al.,  
384 2015). Plants possess an I $\kappa$ B-like protein called NIM1 (Ryals et al., 1997); however, no other  
385 published studies have investigated whether a NF- $\kappa$ B-induced immune response exists in plants. In  
386 the current study, we demonstrated the ability of OspG to increase the phytopathogenicity of non-  
387 *Shigella* bacteria, and also observed degradation of OspG:GFP upon constitutive activation of MAPK  
388 signaling (Fig. 7). The existence of a plant immune signaling pathway similar to that of animal NF- $\kappa$ B,  
389 which would also be the target of OspG, may hence be assumed. Characterization of the previously  
390 unrecognized stress-activated mediators of the innate immunity in plants upon infection with food-  
391 borne pathogens would help better define the defensive functions of plants. Finally, the  
392 characterization of plants as an alternative host for food-borne pathogens will be critical in developing  
393 effective means to prevent their transmission and disease.

394

395

## 396 **Experimental procedures**

### 397 **Plant materials and growth**

398 *Arabidopsis thaliana* accession Columbia (Col-0) was used for *Shigella* infection. Briefly,  
399 *Arabidopsis* seeds were surface-sterilized for 2 min in 70% (v/v) ethanol, incubated in 50% household  
400 bleach for 10 min, washed extensively with sterile deionized water, and planted on 1/2 Murashige and  
401 Skoog (MS) medium (Duchefa Biochemie, Haarlem, Netherlands) supplemented with 1% sucrose and  
402 solidified with 0.6% (w/v) agar (Murashige and Skoog, 1962). *Nicotiana benthamiana* plants were  
403 germinated and grown at 22  $\pm$  3°C under a 16 h light/8 h dark cycle in plastic pots containing steam-  
404 sterilized mixed soil (2:1:1, v/v/v, soil/vermiculite/perlite) (Moon et al., 2016). To measure the plant

405 immune response in terms of MAPK activity, 1  $\mu$ M flg22 peptide (#FLG22-P-1; Alpha Diagnostics,  
406 Inc., San Antonio, TX, USA) was used as a positive control (Bethke et al., 2009).

407

#### 408 **Bacterial strains, growth conditions, and plasmids**

409 The bacterial strains and plasmids used in the study are described in S1 Table. *Shigella* and  
410 *Pseudomonas* strains harboring plasmid pDSK-GFPuv were generated by electroporation, as  
411 described previously (Wang et al., 2007; Hong et al., 2016).

412 *Shigella* spp. were grown at 37°C in Luria-Bertani (LB) medium or tryptic soy agar  
413 containing 0.003% (w/v) Congo red dye (Sigma-Aldrich, St. Louis, MO, USA) (Runyen-Janecky and  
414 Payne, 2002). *Pseudomonas syringae* strains were grown at 28°C (with shaking at 200 rpm) in King's  
415 B liquid medium (Sigma-Aldrich) containing appropriate antibiotics (King et al., 1954). *Escherichia*  
416 *coli* DH5 $\alpha$  was grown in LB medium at 37°C with shaking (Kennedy, 1971) and used as a non-  
417 pathogenic control. *Agrobacterium tumefaciens* GV2260 was grown at 28°C in LB broth with shaking  
418 at 200 rpm (Shamloul et al., 2014).

419 The coding region of *ospF* or *ospG* was PCR-amplified using *attB*-containing PCR primers  
420 (S2 Table). The PCR fragments were cloned into the pDONR<sup>TM</sup>207 vector by BP recombination using  
421 the Gateway<sup>®</sup> BP Clonase<sup>TM</sup> II kit (Invitrogen, Carlsbad, CA, USA). The products were then  
422 transferred to pBAV178 (for AvrRpt2 fusion) or pBAV179 (for HA fusion) vectors by LR  
423 recombination (Gateway<sup>®</sup> LR Clonase<sup>TM</sup> II, Invitrogen). pBAV178, pBAV179, and pME6012 (empty  
424 vector control) were kindly provided by Dr. Jean T. Greenberg (University of Chicago) (Vinatzer et  
425 al., 2005). The products were also transferred to pK7FWG2 (obtained from Ghent University,  
426 Belgium) by LR recombination to produce the GFP-fused *Shigella* effectors OspF:GFP and  
427 OspG:GFP (Karimi et al., 2002).

428

#### 429 **Bacterial inoculation assay *in planta***

430 *Arabidopsis* seedlings (2 weeks old) grown in 1/2 MS medium were used for flood-  
431 inoculation (Ishiga et al., 2011). Briefly, 10 *Arabidopsis* seedlings in one container were incubated for



432 3 min with 35 ml of each bacterial strain suspension ( $5 \times 10^6$  or  $5 \times 10^5$  cfu/ml) containing 0.02%  
433 Silwet L-77 (Lehle Seeds, Round Rock, TX, USA) or buffer. After the bacterial suspensions were  
434 removed by decantation, plates containing inoculated plants were incubated in a growth room ( $23 \pm$   
435  $2^\circ\text{C}$ , 16 h light/8 h dark). Bacterial cell counts from inoculated plants were monitored as described  
436 previously (Ishiga et al., 2011). Three inoculated seedlings in one container were harvested by cutting  
437 the hypocotyls, and total fresh weight was measured. The cfu were normalized to cfu/mg using  
438 sample weight. The cfu of seedlings in three separate containers (as biological replicates) were  
439 measured. In addition, the bacterial population was evaluated in more than three independent  
440 experiments conducted successively under the same conditions.

441 To assess root invasion, 10-d-old *Arabidopsis* seedlings grown vertically in 1/2 MS medium  
442 were inoculated by dropping 2.0  $\mu\text{l}$  of bacterial suspension ( $5 \times 10^7$  cfu/ml) onto the root tips.  
443 Symptoms were observed under white light, and bacterial proliferation was monitored at 5 dpi by  
444 observation of GFP-expressing bacteria under UV light. Three biological replicates were generated in  
445 separate plates, and three independent experiments were conducted under the same conditions.

446

#### 447 **Microscopy**

448 For SEM, flood-inoculated *Arabidopsis* leaves were fixed in 4% (w/v) paraformaldehyde and  
449 dehydrated in an ethanol series (30%, 50%, 70%, 96%, and 100%). The fixed leaves were then dried,  
450 coated with gold-palladium, and visualized using a scanning electron microscope (LEO 1455VP,  
451 Oberkochen, Germany) (Plotnikova et al., 2000). For TEM, flood-inoculated *Arabidopsis* leaves were  
452 cut off, fixed overnight in 2.5% (w/v) glutaraldehyde, post-fixed in 2% (w/v) osmium tetroxide,  
453 dehydrated in ethanol, and embedded in the resin. After staining in 2% (w/v) uranyl acetate and lead  
454 citrate, samples were observed under an electron microscope (Bio-TEM; Tecnai G2 Spirit Twin; FEI,  
455 USA) (Chae and An, 2016).

456 For fluorescence confocal microscopy, inoculated *Arabidopsis* leaves or roots were washed  
457 with sterile water. GFP-labeled bacteria or GFP-tagged *Shigella* effector proteins in plants was  
458 observed under a Nikon laser scanning confocal microscope C2 (Nikon, Tokyo, Japan) using filter

459 sets for GFP ( $\lambda_{\text{ex}}$ , 488 nm;  $\lambda_{\text{em}}$ , 505–530 nm) or RFP ( $\lambda_{\text{ex}}$ , 561 nm;  $\lambda_{\text{em}}$ , 570–620 nm). For each  
460 microscopic method, three leaves were used per treatment and at least three microscopic fields were  
461 observed for each leaf, including the control.

462

### 463 **Expression of *Shigella* virulence genes in *Arabidopsis* plants**

464 Total RNA was extracted from *Shigella*-infected leaves (from three plants) using RNAiso  
465 plus (#9108; TaKaRa, Otsu, Japan), according to the manufacturer's protocol. RT-PCR was  
466 performed using M-MLV reverse transcriptase (Invitrogen), according to the manufacturer's  
467 instructions. Quantitative RT-PCR was carried out in a CFX Connect™ Real Time System (BioRad,  
468 Hercules, CA, USA) using iQ™ SYBR® Green Supermix (BioRad) and primers specific for target  
469 genes (*ipaB*, *ipaC*, *icsA*, *icsB*, *virB*, and *virF*; S3 Table) (Bando et al., 2010). The qRT-PCR results  
470 were normalized to expression of 16s rRNA.

471

### 472 **Immunoblotting**

473 Total protein was extracted from *Shigella*- or *Agrobacterium*-infected leaves (from three  
474 plants) using denaturing extraction buffer [150 mM NaCl, 50 mM Tris-HCl (pH 7.5), 5 mM EDTA,  
475 0.1% Triton-X, 1× protease inhibitor cocktail (Roche, Basel, Switzerland), 0.4 M DTT, 1 M NaF, and  
476 1 M Na<sub>3</sub>VO<sub>3</sub>]. The extracted proteins were separated on 12% SDS-PAGE gels and transferred to a  
477 PVDF membrane (Pierce, Rockford, IL, USA). Antibodies specific for phospho-p44/p42 MAPK  
478 ERK1/2 (#4377; Cell Signaling Technology, Danvers, MA, USA), ERK1 (#sc-94; Santa Cruz, Dallas,  
479 TX, USA), hemagglutinin (HA) (#S2930; Clontech Laboratories, Mountain View, CA, USA), or GFP  
480 (#sc-9996, Santa Cruz) were used for immunoblot analyses. Target proteins were detected using ECL  
481 plus reagent (GE Healthcare, Wauwatosa, WI, USA) and visualized using an Alliance 9.7  
482 chemiluminescence imaging system (UVITEC, Cambridge, UK).

483

### 484 ***Agrobacterium*-mediated transient gene expression**

485 *A. tumefaciens* strain GV2260 harboring the *GFP*, *OspF:GFP*, or *OspG:GFP* genes driven

486 by the 35S promoter was prepared as described previously (Lee et al., 2013). The inoculum ( $OD_{600} =$   
487 0.4) was infiltrated into 4-week-old *N. benthamiana* leaves using a 1 ml needleless syringe. To  
488 observe MEK2<sup>DD</sup>-triggered cell death suppression by *Shigella* effectors, *Agrobacterium* ( $OD_{600} = 0.4$ )  
489 expressing HA:MEK2<sup>DD</sup> was mixed with *Agrobacterium* containing *GFP*, *OspF:GFP*, or *OspG:GFP*  
490 at a 1:1 ratio and infiltrated into the leaves of *N. benthamiana*. Each experiment was repeated using at  
491 least three leaves from the plant, and each experiment included at least three different plants.

492

### 493 **Statistical analysis**

494 All data are expressed as the mean  $\pm$  SD. The statistical significance of bacterial cell growth  
495 in infected plants was examined using Student's t-test (Microsoft Office Excel) and ANOVA (SPSS  
496 v.18; IBM, Armonk, NY, USA) (Moon et al., 2016). Asterisks and letters indicate significant  
497 differences between samples ( $P < 0.05$ ).

498

499

### 500 **Acknowledgments**

501 We thank Dr. Myung Hee Kim for initial support with the preparation of pathogenic *Shigella* strains,  
502 Dr. Jean T. Greenberg for providing the pBAV178, pBAV179, and pME6012 plasmids, and Dr. Cha  
503 Young Kim for providing the HA:MEK2<sup>DD</sup> clone.

504 The authors declare no conflict of interest.

505

506

### 507 **References**

508 Abramovitch, R.B., Anderson, J.C., and Martin, G.B. (2006) Bacterial elicitation and evasion of  
509 plant innate immunity. *Nat Rev Mol Cell Biol* **7**: 601-611.

510 Arbibe, L., Kim, D.W., Batsche, E., Pedron, T., Mateescu, B., Muchardt, C. et al. (2007) An  
511 injected bacterial effector targets chromatin access for transcription factor NF-kappaB to alter  
512 transcription of host genes involved in immune responses. *Nat Immunol* **8**: 47-56.

- 513 Ashida, H., Mimuro, H., and Sasakawa, C. (2015) Shigella Manipulates Host Immune Responses  
514 by Delivering Effector Proteins with Specific Roles. *Frontiers in Immunology* **6**.
- 515 Bando, S.Y., Moreno, A.C., Albuquerque, J.A., Amhaz, J.M., Moreira-Filho, C.A., and Martinez,  
516 M.B. (2010) Expression of bacterial virulence factors and cytokines during in vitro macrophage  
517 infection by enteroinvasive Escherichia coli and Shigella flexneri: a comparative study. *Mem Inst*  
518 *Oswaldo Cruz* **105**: 786-791.
- 519 Barak, J.D., Kramer, L.C., and Hao, L.Y. (2011) Colonization of tomato plants by Salmonella  
520 enterica is cultivar dependent, and type 1 trichomes are preferred colonization sites. *Appl Environ*  
521 *Microbiol* **77**: 498-504.
- 522 Bethke, G., Unthan, T., Uhrig, J.F., Poschl, Y., Gust, A.A., Scheel, D., and Lee, J. (2009) Flg22  
523 regulates the release of an ethylene response factor substrate from MAP kinase 6 in Arabidopsis  
524 thaliana via ethylene signaling. *Proc Natl Acad Sci U S A* **106**: 8067-8072.
- 525 Buttner, D., and Bonas, U. (2003) Common infection strategies of plant and animal pathogenic  
526 bacteria. *Curr Opin Plant Biol* **6**: 312-319.
- 527 Campbell-Valois, F.X., and Pontier, S.M. (2016) Implications of Spatiotemporal Regulation of  
528 Shigella flexneri Type Three Secretion Activity on Effector Functions: Think Globally, Act Locally.  
529 *Front Cell Infect Microbiol* **6**: 28.
- 530 Cevallos-Cevallos, J.M., Gu, G., Danyluk, M.D., and van Bruggen, A.H. (2012) Adhesion and  
531 splash dispersal of Salmonella enterica Typhimurium on tomato leaflets: effects of rdar morphotype  
532 and trichome density. *Int J Food Microbiol* **160**: 58-64.
- 533 Chae, Y., and An, Y.J. (2016) Toxicity and transfer of polyvinylpyrrolidone-coated silver nanowires  
534 in an aquatic food chain consisting of algae, water fleas, and zebrafish. *Aquat Toxicol* **173**: 94-104.
- 535 de Jong, M.F., and Alto, N.M. (2014) Thinking outside the Osp(G)-kinase activation by E2-  
536 ubiquitin. *EMBO J* **33**: 403-404.
- 537 Deering, A.J., Mauer, L.J., and Pruitt, R.E. (2012) Internalization of E. coli O157:H7 and  
538 Salmonella spp. in plants: A review. *Food Research International* **45**: 567-575.
- 539 Gao, X., Huang, Q., Zhao, Z., Han, Q., Ke, X., Qin, H., and Huang, L. (2016) Studies on the

- 540 Infection, Colonization, and Movement of *Pseudomonas syringae* pv. *actinidiae* in Kiwifruit Tissues  
541 Using a GFPuv-Labeled Strain. *PLoS One* **11**: e0151169.
- 542 Golberg, D., Kroupitski, Y., Belausov, E., Pinto, R., and Sela, S. (2011) *Salmonella* Typhimurium  
543 internalization is variable in leafy vegetables and fresh herbs. *Int J Food Microbiol* **145**: 250-257.
- 544 Gu, G., Cevallos-Cevallos, J.M., and van Bruggen, A.H. (2013) Ingress of *Salmonella enterica*  
545 Typhimurium into tomato leaves through hydathodes. *PLoS One* **8**: e53470.
- 546 Guchi, B., and Ashenafi, M. (2010) Microbial load, prevalence and antibiograms of salmonella and  
547 *Shigella* in lettuce and green peppers. *Ethiop J Health Sci* **20**: 41-48.
- 548 Gupta, A., Polyak, C.S., Bishop, R.D., Sobel, J., and Mintz, E.D. (2004) Laboratory-confirmed  
549 shigellosis in the United States, 1989-2002: epidemiologic trends and patterns. *Clin Infect Dis* **38**:  
550 1372-1377.
- 551 Holt, K.E., Baker, S., Weill, F.-X., Holmes, E.C., Kitchen, A., Yu, J. et al. (2012) *Shigella sonnei*  
552 genome sequencing and phylogenetic analysis indicate recent global dissemination from Europe. *Nat*  
553 *Genet* **44**: 1056-1059.
- 554 Hong, C.E., Kwon, S.Y., and Park, J.M. (2016) Biocontrol activity of *Paenibacillus polymyxa* AC-1  
555 against *Pseudomonas syringae* and its interaction with *Arabidopsis thaliana*. *Microbiological Research*  
556 **185**: 13-21.
- 557 Huot, B., Castroverde, C.D.M., Velásquez, A.C., Hubbard, E., Pulman, J.A., Yao, J. et al. (2017)  
558 Dual impact of elevated temperature on plant defence and bacterial virulence in *Arabidopsis*. *Nature*  
559 *Communications* **8**: 1808.
- 560 Iniguez, A.L., Dong, Y., Carter, H.D., Ahmer, B.M.M., Stone, J.M., and Triplett, E.W. (2005)  
561 Regulation of Enteric Endophytic Bacterial Colonization by Plant Defenses. *Molecular Plant-Microbe*  
562 *Interactions* **18**: 169-178.
- 563 Ishiga, Y., Ishiga, T., Uppalapati, S.R., and Mysore, K.S. (2011) *Arabidopsis* seedling flood-  
564 inoculation technique: a rapid and reliable assay for studying plant-bacterial interactions. *Plant*  
565 *Methods* **7**: 32.
- 566 Jha, A.K., Bais, H.P., and Vivanco, J.M. (2005) *Enterococcus faecalis* mammalian virulence-related

- 567 factors exhibit potent pathogenicity in the Arabidopsis thaliana plant model. *Infect Immun* **73**: 464-  
568 475.
- 569 Jones, J.D., and Dangl, J.L. (2006) The plant immune system. *Nature* **444**: 323-329.
- 570 Karimi, M., Inzé, D., and Depicker, A. (2002) GATEWAY™ vectors for Agrobacterium-mediated  
571 plant transformation. *Trends in Plant Science* **7**: 193-195.
- 572 Kennedy, C.K. (1971) Induction of colicin production by high temperature or inhibition of protein  
573 synthesis. *J Bacteriol* **108**: 10-19.
- 574 Kim, C.Y., and Zhang, S. (2004) Activation of a mitogen-activated protein kinase cascade induces  
575 WRKY family of transcription factors and defense genes in tobacco. *The Plant Journal* **38**: 142-151.
- 576 Kim, D.W., Lenzen, G., Page, A.L., Legrain, P., Sansonetti, P.J., and Parsot, C. (2005) The Shigella  
577 flexneri effector OspG interferes with innate immune responses by targeting ubiquitin-conjugating  
578 enzymes. *Proc Natl Acad Sci U S A* **102**: 14046-14051.
- 579 King, E.O., Ward, M.K., and Raney, D.E. (1954) Two simple media for the demonstration of  
580 pyocyanin and fluorescin. *J Lab Clin Med* **44**: 301-307.
- 581 Lee, J., Teitzel, G.M., Munkvold, K., del Pozo, O., Martin, G.B., Michelmore, R.W., and Greenberg,  
582 J.T. (2012) Type III secretion and effectors shape the survival and growth pattern of Pseudomonas  
583 syringae on leaf surfaces. *Plant Physiology*.
- 584 Lee, J.H., Kim, Y.C., Choi, D., and Park, J.M. (2013) Identification of novel pepper genes involved  
585 in Bax- or INF1-mediated cell death responses by high-throughput virus-induced gene silencing. *Int J*  
586 *Mol Sci* **14**: 22782-22795.
- 587 Li, H., Xu, H., Zhou, Y., Zhang, J., Long, C., Li, S. et al. (2007) The phosphothreonine lyase  
588 activity of a bacterial type III effector family. *Science* **315**: 1000-1003.
- 589 Lindberg, A.A., Karnell, A., and Weintraub, A. (1991) The lipopolysaccharide of Shigella bacteria  
590 as a virulence factor. *Rev Infect Dis* **13 Suppl 4**: S279-284.
- 591 Liu, X., Sun, Y., Korner, C.J., Du, X., Vollmer, M.E., and Pajeroska-Mukhtar, K.M. (2015)  
592 Bacterial Leaf Infiltration Assay for Fine Characterization of Plant Defense Responses using the  
593 Arabidopsis thaliana-Pseudomonas syringae Pathosystem. *J Vis Exp*.

- 594 Martínez-Vaz, B.M., Fink, R.C., Diez-Gonzalez, F., and Sadowsky, M.J. (2014) Enteric Pathogen-  
595 Plant Interactions: Molecular Connections Leading to Colonization and Growth and Implications for  
596 Food Safety. *Microbes and Environments* **29**: 123-135.
- 597 Mead, P.S., Slutsker, L., Dietz, V., McCaig, L.F., Bresee, J.S., Shapiro, C. et al. (1999) Food-related  
598 illness and death in the United States. *Emerg Infect Dis* **5**: 607-625.
- 599 Moon, J.Y., Lee, J.H., Oh, C.-S., Kang, H.-G., and Park, J.M. (2016) Endoplasmic reticulum stress  
600 responses function in the HRT-mediated hypersensitive response in *Nicotiana benthamiana*.  
601 *Molecular Plant Pathology* **17**: 1382-1397.
- 602 Mortality, G.B.D., and Causes of Death, C. (2016) Global, regional, and national life expectancy,  
603 all-cause mortality, and cause-specific mortality for 249 causes of death, 1980-2015: a systematic  
604 analysis for the Global Burden of Disease Study 2015. *Lancet* **388**: 1459-1544.
- 605 Mudgett, M.B. (2005) New insights to the function of phytopathogenic bacterial type III effectors  
606 in plants. *Annu Rev Plant Biol* **56**: 509-531.
- 607 Murashige, T., and Skoog, F. (1962) A Revised Medium for Rapid Growth and Bio Assays with  
608 Tobacco Tissue Cultures. *Physiologia Plantarum* **15**: 473-497.
- 609 Neumann, C., Fraiture, M., Hernandez-Reyes, C., Akum, F.N., Virlogeux-Payant, I., Chen, Y. et al.  
610 (2014) The Salmonella effector protein SpvC, a phosphothreonine lyase is functional in plant cells.  
611 *Front Microbiol* **5**: 548.
- 612 Ogawa, M., Handa, Y., Ashida, H., Suzuki, M., and Sasakawa, C. (2008) The versatility of Shigella  
613 effectors. *Nat Rev Micro* **6**: 11-16.
- 614 Onodera, N.T., Ryu, J., Durbic, T., Nislow, C., Archibald, J.M., and Rohde, J.R. (2012) Genome  
615 Sequence of *Shigella flexneri* Serotype 5a Strain M90T Sm. *Journal of Bacteriology* **194**: 3022.
- 616 Panchal, S., Roy, D., Chitrakar, R., Price, L., Breitbach, Z.S., Armstrong, D.W., and Melotto, M.  
617 (2016) Coronatine Facilitates *Pseudomonas syringae* Infection of *Arabidopsis* Leaves at Night. *Front*  
618 *Plant Sci* **7**: 880.
- 619 Pandey, P.K., Kass, P.H., Soupir, M.L., Biswas, S., and Singh, V.P. (2014) Contamination of water  
620 resources by pathogenic bacteria. *AMB Express* **4**: 51.

- 621 Park, E., Lee, H.Y., Woo, J., Choi, D., and Dinesh-Kumar, S.P. (2017) Spatiotemporal Monitoring  
622 of *Pseudomonas syringae* Effectors via Type III Secretion Using Split Fluorescent Protein Fragments.  
623 *Plant Cell* **29**: 1571-1584.
- 624 Phalipon, A., and Sansonetti, P.J. (2007) Shigella's ways of manipulating the host intestinal innate  
625 and adaptive immune system: a tool box for survival? *Immunol Cell Biol* **85**: 119-129.
- 626 Plotnikova, J.M., Rahme, L.G., and Ausubel, F.M. (2000) Pathogenesis of the human opportunistic  
627 pathogen *Pseudomonas aeruginosa* PA14 in *Arabidopsis*. *Plant Physiol* **124**: 1766-1774.
- 628 Runyen-Janecky, L.J., and Payne, S.M. (2002) Identification of chromosomal *Shigella flexneri*  
629 genes induced by the eukaryotic intracellular environment. *Infect Immun* **70**: 4379-4388.
- 630 Ryals, J., Weymann, K., Lawton, K., Friedrich, L., Ellis, D., Steiner, H.Y. et al. (1997) The  
631 *Arabidopsis* NIM1 protein shows homology to the mammalian transcription factor inhibitor I kappa B.  
632 *Plant Cell* **9**: 425-439.
- 633 Sansonetti, P.J., Kopecko, D.J., and Formal, S.B. (1982) Involvement of a plasmid in the invasive  
634 ability of *Shigella flexneri*. *Infect Immun* **35**: 852-860.
- 635 Schikora, A., Garcia, A.V., and Hirt, H. (2012) Plants as alternative hosts for *Salmonella*. *Trends*  
636 *Plant Sci* **17**: 245-249.
- 637 Schikora, A., Virlogeux-Payant, I., Bueso, E., Garcia, A.V., Nilau, T., Charrier, A. et al. (2011)  
638 Conservation of *Salmonella* infection mechanisms in plants and animals. *PLoS One* **6**: e24112.
- 639 Schroeder, G.N., and Hilbi, H. (2008) Molecular pathogenesis of *Shigella* spp.: controlling host cell  
640 signaling, invasion, and death by type III secretion. *Clin Microbiol Rev* **21**: 134-156.
- 641 Semenov, A.M., Kuprianov, A.A., and van Bruggen, A.H. (2010) Transfer of enteric pathogens to  
642 successive habitats as part of microbial cycles. *Microb Ecol* **60**: 239-249.
- 643 Shamloul, M., Trusa, J., Mett, V., and Yusibov, V. (2014) Optimization and utilization of  
644 *Agrobacterium*-mediated transient protein production in *Nicotiana*. *J Vis Exp*.
- 645 Shaw, R.K., Berger, C.N., Feys, B., Knutton, S., Pallen, M.J., and Frankel, G. (2008)  
646 Enterohemorrhagic *Escherichia coli* Exploits EspA Filaments for Attachment to Salad Leaves.  
647 *Applied and Environmental Microbiology* **74**: 2908-2914.



- 648 Shim, D.H., Suzuki, T., Chang, S.Y., Park, S.M., Sansonetti, P.J., Sasakawa, C., and Kweon, M.N.  
649 (2007) New animal model of shigellosis in the Guinea pig: its usefulness for protective efficacy  
650 studies. *J Immunol* **178**: 2476-2482.
- 651 Shirron, N., and Yaron, S. (2011) Active suppression of early immune response in tobacco by the  
652 human pathogen *Salmonella* Typhimurium. *PLoS One* **6**: e18855.
- 653 Solomon, E.B., Yaron, S., and Matthews, K.R. (2002) Transmission of *Escherichia coli* O157:H7  
654 from contaminated manure and irrigation water to lettuce plant tissue and its subsequent  
655 internalization. *Appl Environ Microbiol* **68**: 397-400.
- 656 Tobe, T., Nagai, S., Okada, N., Adler, B., Yoshikawa, M., and Sasakawa, C. (1991) Temperature-  
657 regulated expression of invasion genes in *Shigella flexneri* is controlled through the transcriptional  
658 activation of the *virB* gene on the large plasmid. *Mol Microbiol* **5**: 887-893.
- 659 Vinatzer, B.A., Jelenska, J., and Greenberg, J.T. (2005) Bioinformatics correctly identifies many  
660 type III secretion substrates in the plant pathogen *Pseudomonas syringae* and the biocontrol isolate *P.*  
661 *fluorescens* SBW25. *Mol Plant Microbe Interact* **18**: 877-888.
- 662 Wang, K., Kang, L., Anand, A., Lazarovits, G., and Mysore, K.S. (2007) Monitoring in planta  
663 bacterial infection at both cellular and whole-plant levels using the green fluorescent protein variant  
664 GFPuv. *New Phytologist* **174**: 212-223.
- 665 Wei, J., Goldberg, M.B., Burland, V., Venkatesan, M.M., Deng, W., Fournier, G. et al. (2003)  
666 Complete Genome Sequence and Comparative Genomics of *Shigella flexneri* Serotype 2a Strain  
667 2457T. *Infection and Immunity* **71**: 2775-2786.
- 668 Weir, E. (2002) *Shigella*: wash your hands of the whole dirty business. *CMAJ* **167**: 281.
- 669 Wenneras, C., Ave, P., Huerre, M., Arondel, J., Ulevitch, R.J., Mathison, J.C., and Sansonetti, P.  
670 (2000) Blockade of CD14 increases *Shigella*-mediated invasion and tissue destruction. *J Immunol* **164**:  
671 3214-3221.
- 672 Yang, K.Y., Liu, Y., and Zhang, S. (2001) Activation of a mitogen-activated protein kinase pathway  
673 is involved in disease resistance in tobacco. *Proc Natl Acad Sci U S A* **98**: 741-746.
- 674 Yeats, T.H., and Rose, J.K.C. (2013) The Formation and Function of Plant Cuticles. *Plant*

675 *Physiology* **163**: 5-20.

676 Zhang, R., Zhou, H.W., Cai, J.C., Zhang, J., Chen, G.X., Nasu, M., and Xie, X.Y. (2011) Serotypes  
677 and extended-spectrum beta-lactamase types of clinical isolates of *Shigella* spp. from the Zhejiang  
678 province of China. *Diagn Microbiol Infect Dis* **69**: 98-104.

679 Zhou, Y., Dong, N., Hu, L., and Shao, F. (2013) The *Shigella* type three secretion system effector  
680 OspG directly and specifically binds to host ubiquitin for activation. *PLoS One* **8**: e57558.

681 Zipfel, C. (2009) Early molecular events in PAMP-triggered immunity. *Curr Opin Plant Biol* **12**:  
682 414-420.

683 Zurawski, D.V., Mitsuhashi, C., Mumy, K.L., McCormick, B.A., and Maurelli, A.T. (2006) OspF  
684 and OspC1 are *Shigella flexneri* type III secretion system effectors that are required for postinvasion  
685 aspects of virulence. *Infect Immun* **74**: 5964-5976.

686

687 **Figure legends**

688 **Fig. 1.** *Shigella* proliferates and induces disease symptoms in *Arabidopsis* plants. **(A, B)** *Arabidopsis*  
689 seedlings in 1/2 MS medium were flood-inoculated with sterile water containing 0.025% Silwet L-77  
690 (Mock) or bacterial suspensions ( $5 \times 10^5$  cfu/ml). **(A)** The symptoms of *Arabidopsis* inoculated with  
691 *Shigella* spp. by flood-inoculation. Photographs of representative symptoms were taken at 3 dpi. **(B)**  
692 Bacterial cell numbers were evaluated on Days 0 and 3 after flood-inoculation. The bars represent the  
693 mean  $\pm$  SD of three replicates and the different letters indicate significant differences between  
694 samples ( $P < 0.05$ , one-way ANOVA). All experiments were repeated three times independently and  
695 representative results are shown.

696

697 **Fig. 2.** *Shigella* adheres to the *Arabidopsis* epidermis and clusters around guard cells. *Arabidopsis*  
698 seedlings were flood-inoculated with bacterial suspensions ( $5 \times 10^6$  cfu/ml). After 24 h, the leaves  
699 were fixed and analyzed under a SEM. The *Pst* cells were observed over the stomata. *Shigella* strains  
700 were associated with the stomata. Bar, 10  $\mu$ m. Representative image showing bacteria around guard  
701 cells (indicated by white arrows). The results are representative of two independent experiments.

702

703 **Fig. 3.** *Shigella* localizes in the apoplast and affects plant cell structures. *Arabidopsis* seedlings were  
704 flood-inoculated with bacterial suspensions ( $5 \times 10^6$  cfu/ml). After 24 h, the leaves were evaluated  
705 under a TEM. The *Shigella* strains colonized the intercellular spaces. Bar, 5  $\mu$ m (left panels). Bar, 1  
706  $\mu$ m (right panels). Each column of micrographs represents a different magnification. TEM images  
707 revealed the *Shigella* (white arrows) attached to the cell wall in the intercellular spaces and altered  
708 mesophyll cells. Black arrows indicate separation of the plasma membrane from the cell wall, the  
709 abnormal organelles and disruption of chloroplasts. The results are representative of two independent  
710 experiments.

711

712 **Fig. 4.** *Shigella S. f2a* invades and colonizes plant roots. **(A, B)** Root tips of *Arabidopsis* seedlings  
713 were drop-inoculated with GFP-labeled bacterial suspensions ( $5 \times 10^7$  cfu/ml). **(A)** Bacterial

714 colonization of inoculated plants was photographed under white and UV light at 5 dpi. **(B)** GFP-  
715 labeled *Shigella* are localized in the epidermal or endodermal cells of *Arabidopsis* roots. GFP images  
716 were taken using a confocal microscope. Higher magnification micrographs and 3D Raman confocal  
717 volume images show internalization of *S. f*2a in *Arabidopsis* roots. All experiments were repeated at  
718 least three times, and representative results are shown.

719

720 **Fig. 5.** The virulence plasmid-deficient mutant of *Shigella* is impaired in the *Arabidopsis*  
721 multiplication. **(A, B)** *Arabidopsis* seedlings in 1/2 MS medium were flood-inoculated with DH5 $\alpha$ , *S.*  
722 *f*2a,  $\Delta$ vp, *S. f*5a, or BS176, and their GFP-labeled variants ( $5 \times 10^5$  cfu/ml). **(A)** The bacterial cell  
723 numbers *in planta* were determined at 0 and 3 dpi. Bars represent the mean  $\pm$  SD of three replicates  
724 and the different letters indicate significant differences between samples ( $P < 0.05$ , one-way ANOVA).  
725 **(B)** Images of GFP-labeled wild-type *Shigella* in leaf epidermal cells of *Arabidopsis* acquired at 24  
726 hpi under a fluorescence confocal microscope. Bar, 10  $\mu$ m. The blue represents auto-fluorescence of  
727 chlorophyll. All experiments were repeated at least three times, and representative results are shown.

728

729 **Fig. 6.** Expression of *Shigella* effectors and MAPK activation in *Arabidopsis* plants in response to  
730 virulence plasmid-deficient *Shigella* mutants. **(A, B)** *Arabidopsis* leaves were syringe-infiltrated with  
731 buffer, 1  $\mu$ M flg22, or bacterial suspension ( $5 \times 10^6$  cfu/ml), and samples were collected at the  
732 indicated times. **(A)** Transcription of *Shigella* effectors (*ipaB*, *ipaC*, *icsA*, *icsB*, *virB*, and *virF*) in  
733 infected *Arabidopsis* leaves was analyzed by qRT-PCR. qRT-PCR results were normalized to  
734 expression of 16s rRNA. Expression of effectors by plasmid-deficient mutant strains was compared  
735 with that in the WT. Data are expressed as the mean  $\pm$  SD of three replicates. **(B)** Immunoblotting was  
736 performed using either anti-phospho-p44/42 (ERK1/2, upper panels) or anti-ERK1 (lower panels)  
737 antibodies. All experiments were repeated at least three times, each with similar results.

738

739 **Fig. 7.** The virulence activities of *Shigella* effectors OspF or OspG. **(A, B)** *Arabidopsis* plants were  
740 sprayed with *Pst* cells carrying an empty vector (pME6012), or with cells producing OspF:HA or

741 OspG:HA ( $5 \times 10^7$  cfu/ml). **(A)** Disease symptoms were monitored for 4 d after spraying. **(B)**  
742 Proliferation of *Pst* cells producing *Shigella* effector proteins in *Arabidopsis* at 0 and 4 d after spray-  
743 inoculation. Bars represent the mean  $\pm$  SD of six replicates, and different letters indicate significant  
744 differences between samples ( $P < 0.05$ , two-way ANOVA). All experiments were repeated at least  
745 three times. **(C)** Co-expression of OspF:GFP suppresses tobacco MEK2<sup>DD</sup>-triggered cell death. GFP,  
746 OspF:GFP, or OspG:GFP was produced with HA:MEK2<sup>DD</sup> in *N. benthamiana* leaves upon infiltration  
747 by *Agrobacterium* carrying the appropriate expression constructs (OD<sub>600</sub> 0.4). **(D)** Production of  
748 specific proteins in samples from panel A was analyzed by immunoblotting using anti-GFP, anti-HA,  
749 anti-phospho-p44/42 (ERK1/2), and anti-ERK1 antibodies. Ponceau S was used to stain the RuBisCo  
750 protein (loading control). The asterisk indicates the size of the GFP protein not associated with  
751 effector proteins.

752

753 **Fig. 8.** The *Shigella* effector proteins OspF and OspG underpin the bacterial virulence in plants. **(A)**  
754 The virulence of the OspF- or OspG-deficient *Shigella* mutants is impaired in the *Arabidopsis* model.  
755 *Arabidopsis* seedlings in 1/2 MS medium were flood-inoculated with *S. f* 5a,  $\Delta ospF$ ,  $\Delta ospF+pospF$ ,  
756  $\Delta ospG$ , or  $\Delta ospG+pospG$  ( $5 \times 10^5$  cfu/ml). Photographs of representative disease symptoms were  
757 taken, and bacterial cell numbers *in planta* were determined, at 3 dpi. The bars represent the mean  $\pm$   
758 SD of three replicates. The different letters indicate significant differences between samples ( $P < 0.05$ ,  
759 one-way ANOVA). **(B)** MAPK activation in *Arabidopsis* plants in response to infection by ospF or  
760 ospG deletion mutants. *Arabidopsis* leaves were infiltrated with each bacterial strain as described  
761 previously and then collected at the indicated times. Anti-phospho-p44/42 (ERK1/2, upper panels) or  
762 anti-ERK1 (lower panels) antibodies were used for immunoblotting. All experiments were repeated at  
763 least three times, with similar results.

**A**

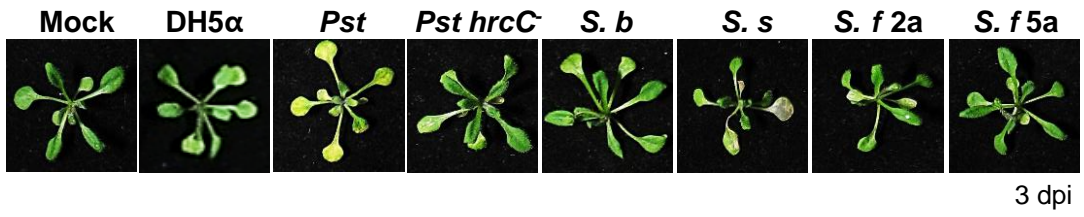

**B**

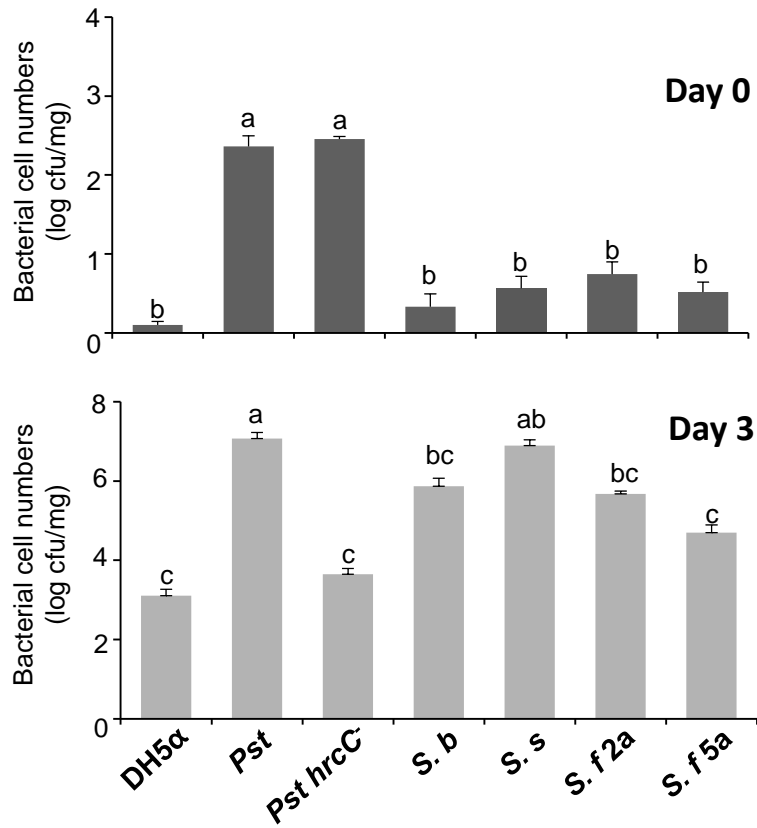

Fig.1



**Mock**

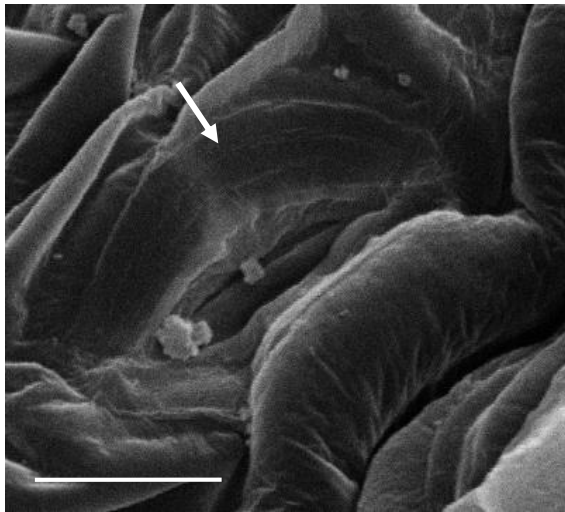

**Pst**

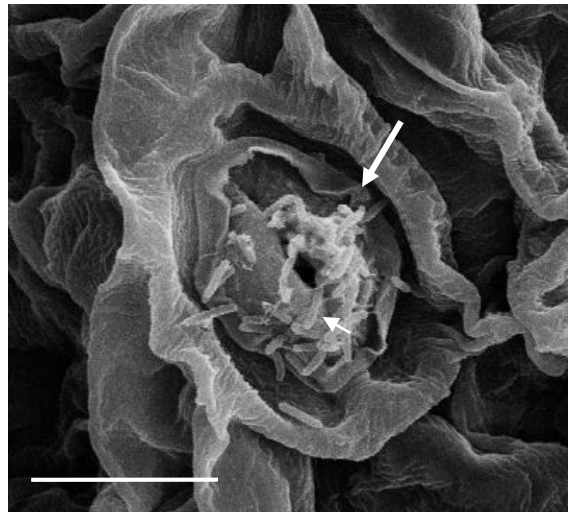

**S. b**

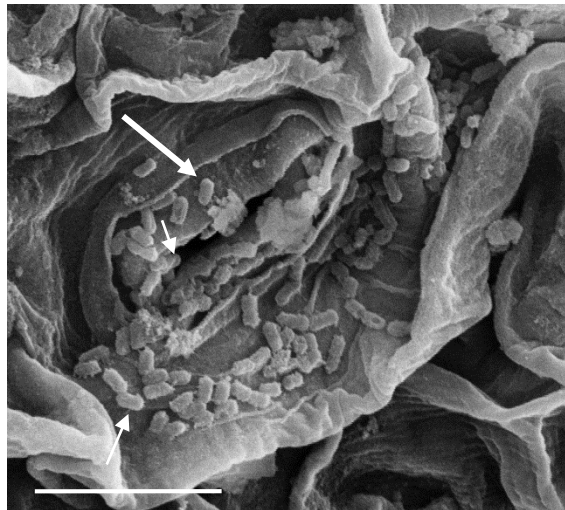

**S. s**

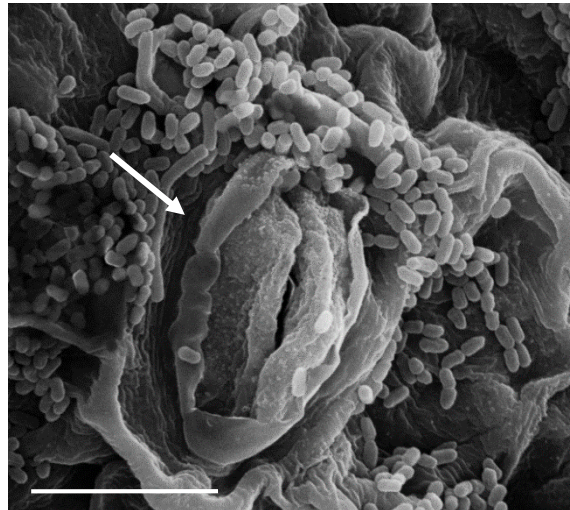

**S. f2a**

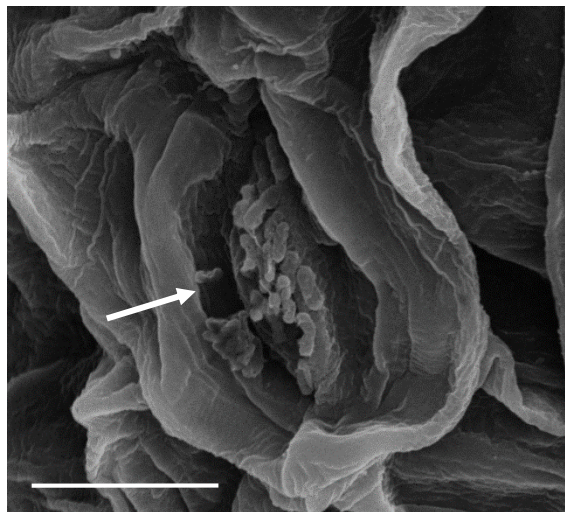

**S. f5a**

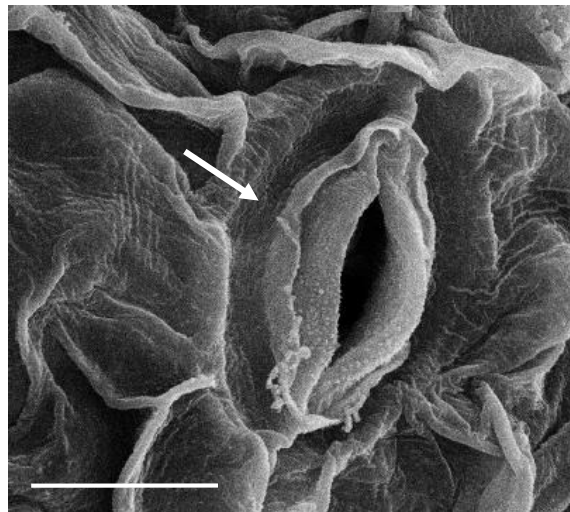

Fig.2

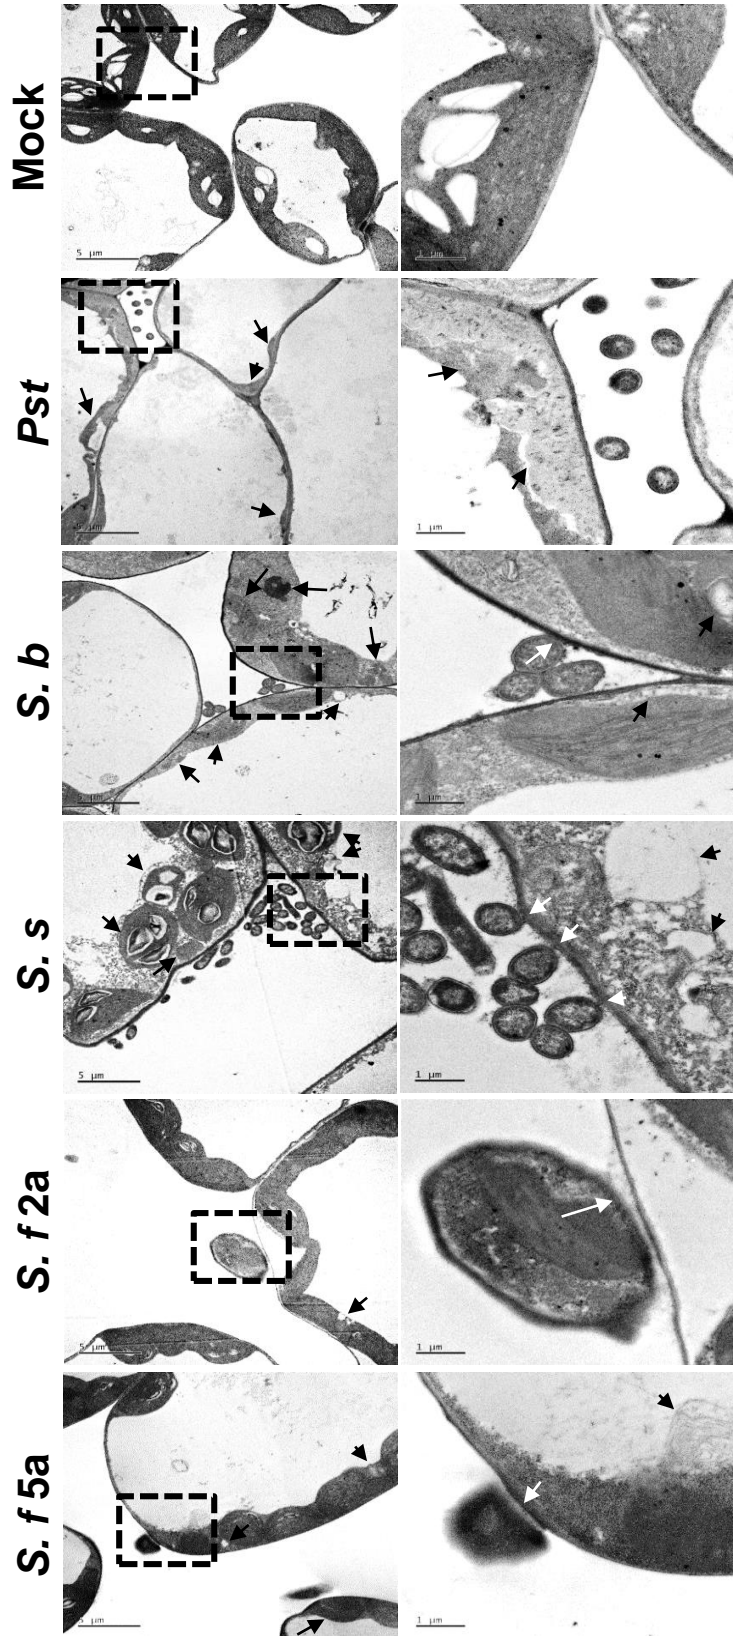

Fig.3



**A**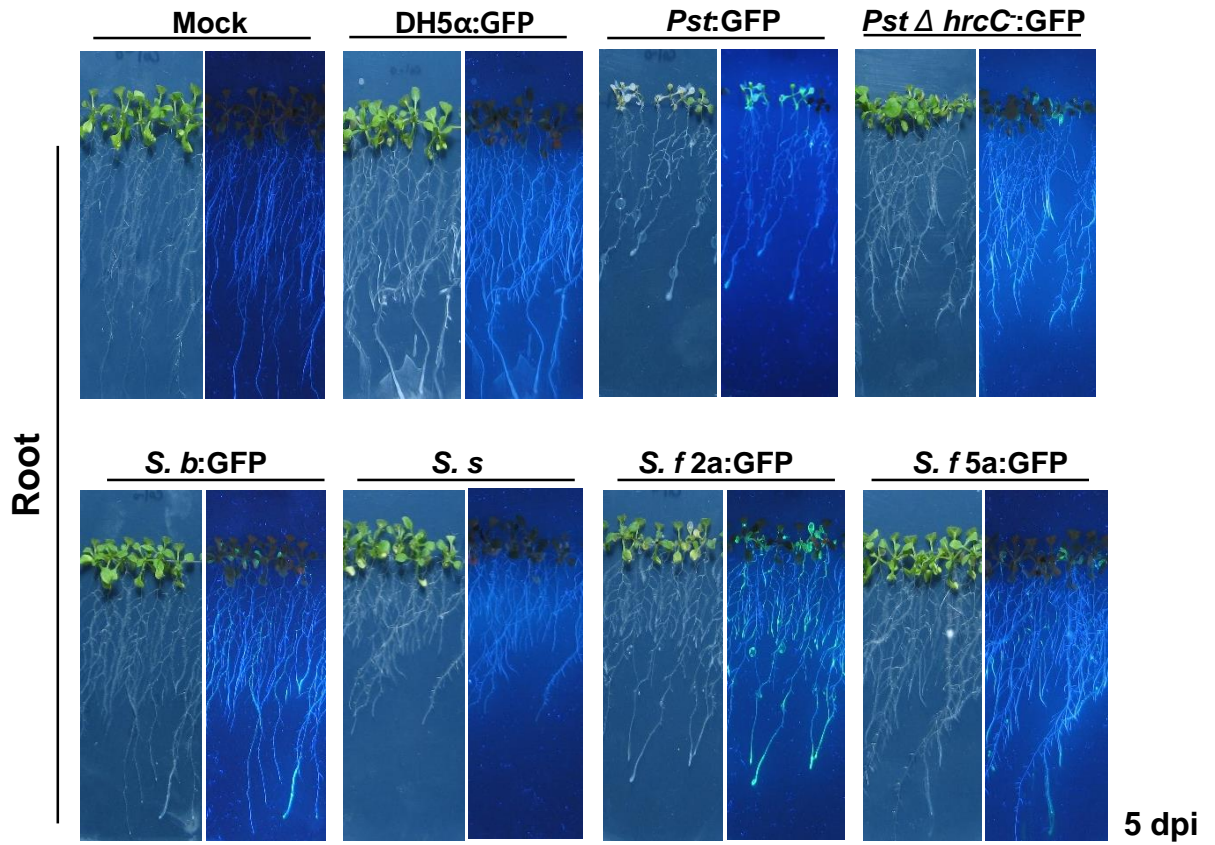**B**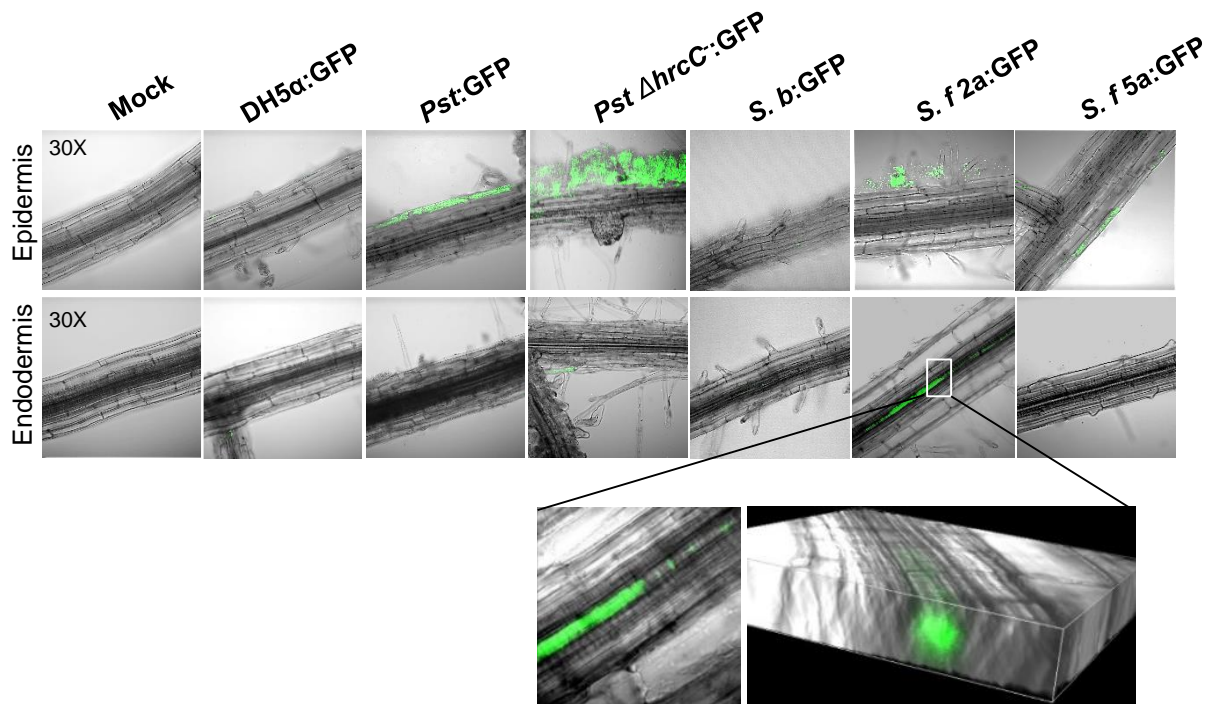

Fig.4

**A**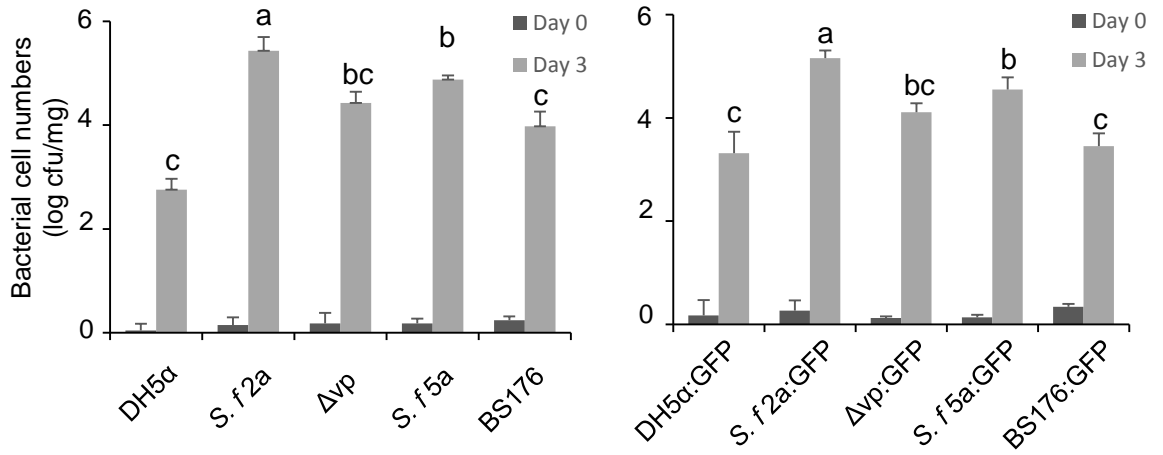**B**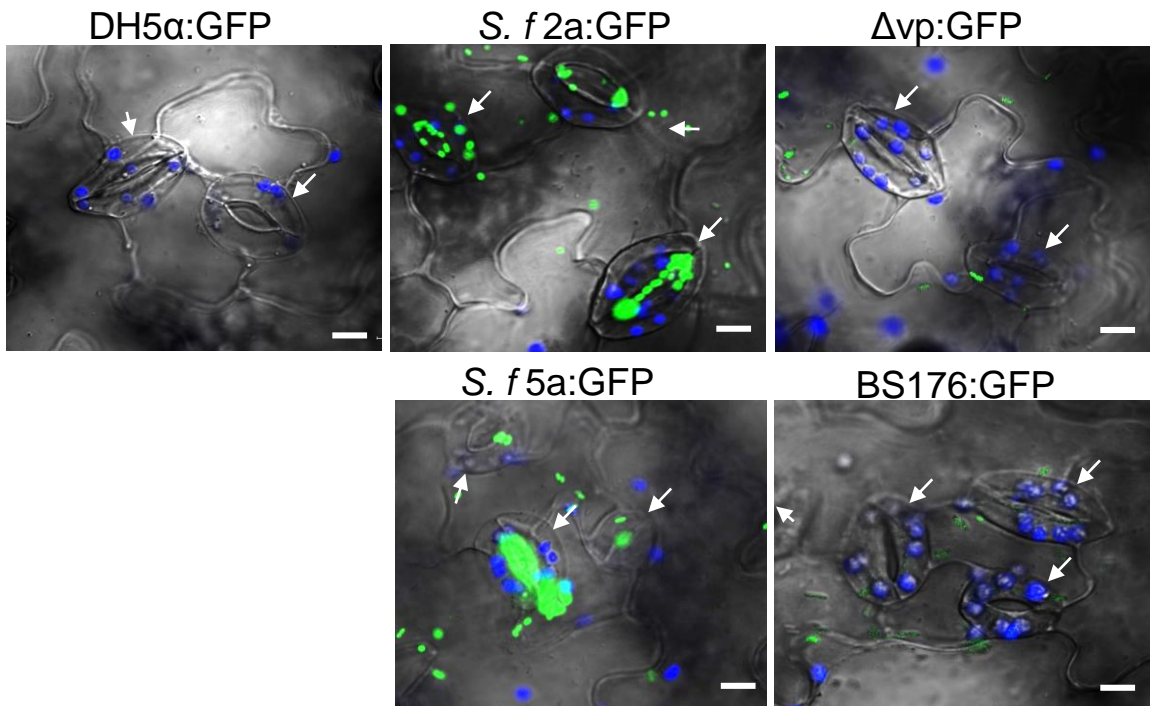

Fig.5

**A**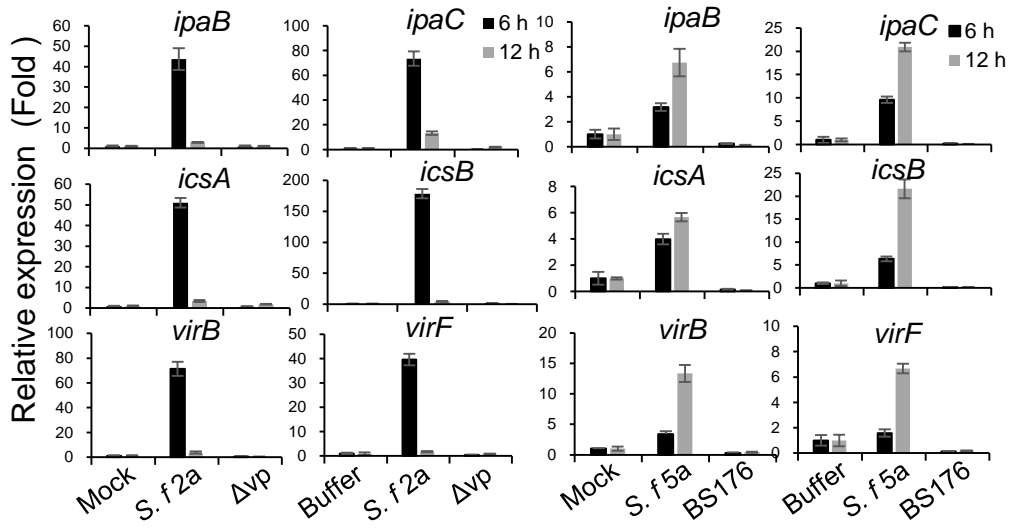**B**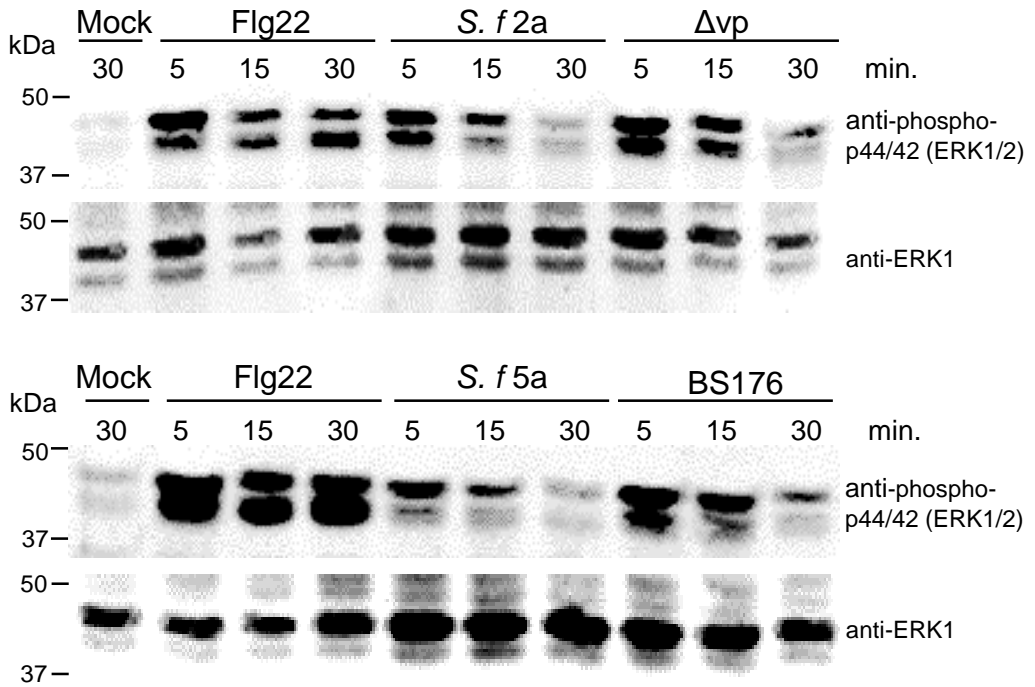

Fig.6

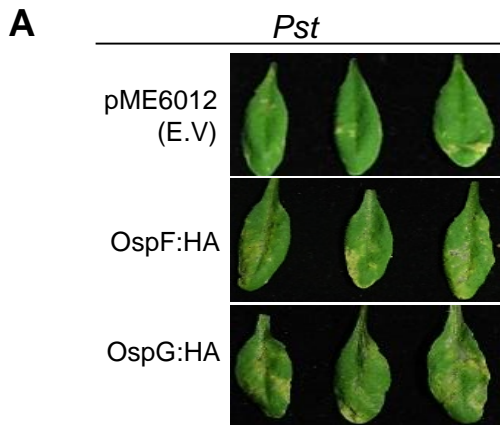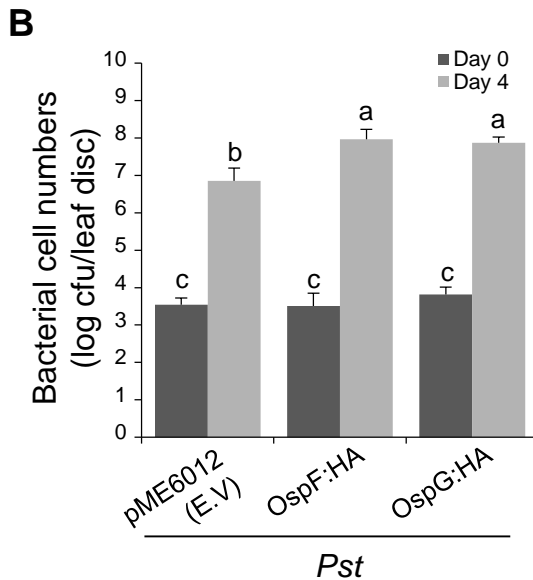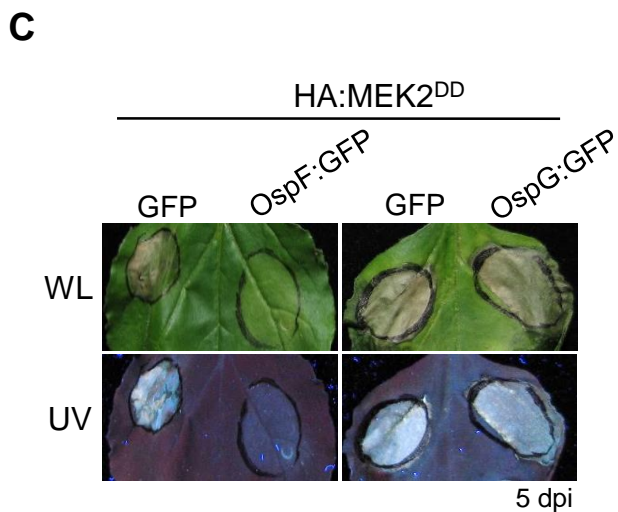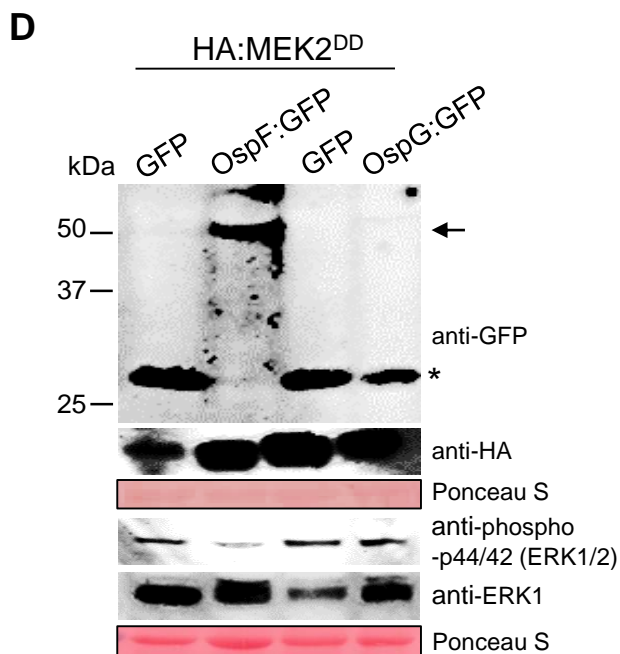

Fig.7

**A**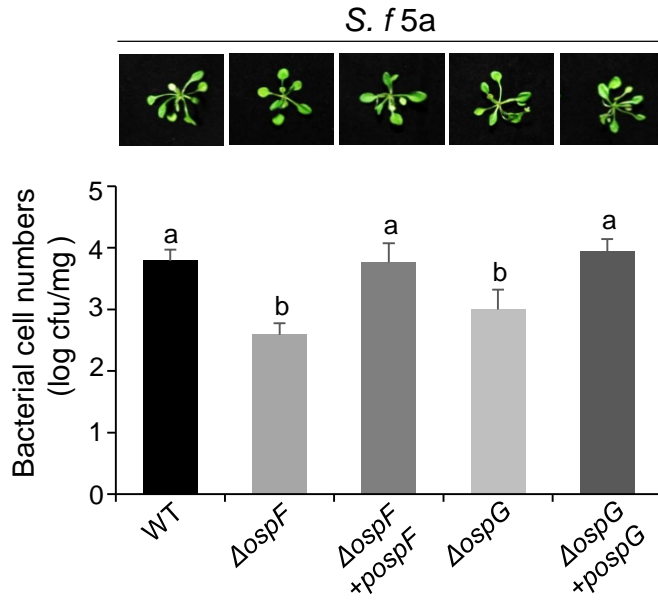**B**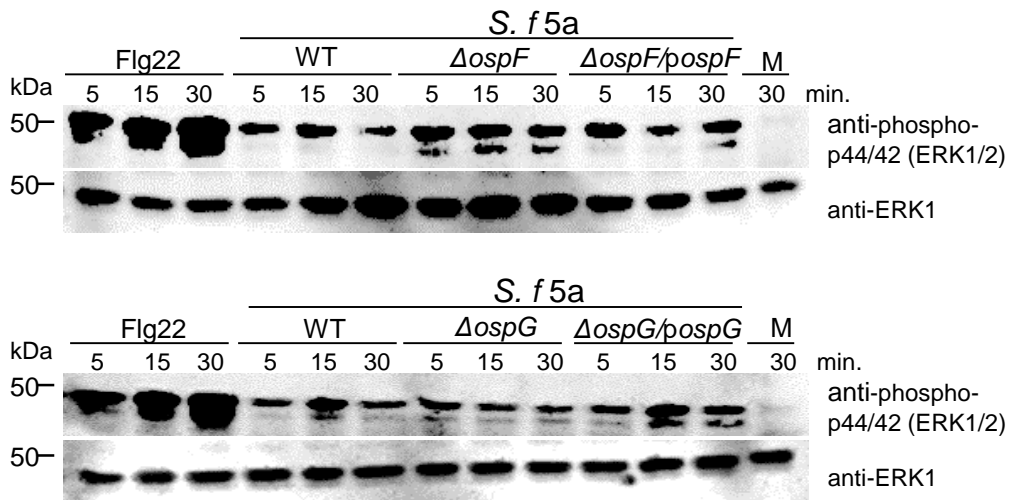

Fig.8
